1 **Balancing grain yield trade-offs in ‘Miracle-Wheat’**

2 Ragavendran Abbai<sup>1\*</sup>, Guy Golan<sup>1</sup>, C. Friedrich H. Longin<sup>2</sup> and Thorsten Schnurbusch<sup>1,3\*</sup>

3

4 <sup>1</sup>Research Group Plant Architecture, Leibniz Institute of Plant Genetics and Crop Plant  
5 Research (IPK), OT Gatersleben, 06466 Seeland, Germany

6 <sup>2</sup>State Plant Breeding Institute, University of Hohenheim, Fruwirthstr. 21, 70599 Stuttgart,  
7 Germany

8 <sup>3</sup>Martin Luther University Halle-Wittenberg, Faculty of Natural Sciences III, Institute of  
9 Agricultural and Nutritional Sciences, 06120 Halle, Germany

10

11 \*Correspondence:

12 Ragavendran Abbai, Email: [abbai@ipk-gatersleben.de](mailto:abbai@ipk-gatersleben.de)

13 Thorsten Schnurbusch, Email: [schnurbusch@ipk-gatersleben.de](mailto:schnurbusch@ipk-gatersleben.de)

14

15 ORCID:

16 Ragavendran Abbai: 0000-0002-5712-910X

17 Guy Golan: 0000-0002-5255-393X

18 C. Friedrich H. Longin: 0000-0002-0737-1651

19 Thorsten Schnurbusch: 0000-0002-5267-0677

20

21 Running title:

22 Source-Sink strength in ‘Miracle-Wheat’

23

24 Word count:

25 Introduction-1129; Results-1528; Discussion-1493; Conclusion-177

26

27 Main Figures:

28 Figs. 1-7

29

30 Supplementary data:

31 Figs. S1-S13 & Table S1.

32 **HIGHLIGHT**

33 Assimilate production and reallocation potential determines grain yield in the spike-branching  
34 'Miracle-Wheat'.

35

36 **ABSTRACT**

37 Introducing variations in inflorescence architecture, such as the 'Miracle-Wheat' (*Triticum*  
38 *turgidum* convar. *compositum* (L.f.) Filat.) with a branching spike, has relevance for  
39 enhancing wheat grain yield. However, in the spike-branching genotypes, the increase in  
40 spikelet number is generally not translated into grain yield advantage because of reduced  
41 spikelet fertility and grain weight. Here, we investigated if such trade-offs might be a function  
42 of source-sink strength by using 385 RILs developed by intercrossing the spike-branching  
43 landrace TRI 984 and CIRNO C2008, an elite durum (*T. durum* L.) cultivar; they were  
44 genotyped using the 25K array. Various plant and spike architectural traits, including flag  
45 leaf, peduncle and spike senescence rate, were phenotyped under field conditions for two  
46 consecutive years. On Chr 5AL, we found a new modifier QTL for spike-branching, *branched*  
47 *head*<sup>3</sup> (*bh*<sup>3</sup>-A3), which was epistatic to the previously known *bh*<sup>3</sup>-A1 locus. Besides, *bh*<sup>3</sup>-A3  
48 was associated with more grains per spikelet and a delay in flag leaf senescence rate.  
49 Importantly, favourable alleles *viz.*, *bh*<sup>3</sup>-A3 and *grain protein content* (*gpc*-B1) that delayed  
50 senescence are required to improve spikelet fertility and grain weight in the spike-branching  
51 RILs. In summary, achieving a balanced source-sink relationship might minimise grain yield  
52 trade-offs in Miracle-Wheat.

53

54 Keywords:

55 Grain number, Grain weight, Grain yield, Inflorescence branching, QTLs, Senescence rate,  
56 Source-Sink strength, Trade-offs

57

58

59 **ABBREVIATIONS**

60 Chr: Chromosome; RILs: Recombinant inbred lines; QTL: Quantitative trait locus

## 61 INTRODUCTION

62 Wheat (*Triticum* sp.) inflorescence – ‘Spike’ is a determinate structure harbouring the grain-  
63 bearing spikelets on its rachis in a distichous pattern. During immature spike development, the  
64 inflorescence meristem gives rise to multiple spikelet meristems in an acropetal manner. In  
65 turn, each spikelet meristem (indeterminate) produces florets, that potentially form grains  
66 (Kirby and Appleyard, 1984; Koppolu and Schnurbusch, 2019). However, some exceptions  
67 deviate from this standard developmental programme, such as the ‘Miracle-Wheat’ that  
68 produces a non-canonical spike with lateral branches instead of spikelets. Here, due to a  
69 single amino acid substitution in the *branched head<sup>t</sup>* (*bh<sup>t</sup>*) allele of *T. turgidum* convar.  
70 *compositum* (L.f.) Filat. accessions, encoding an APETALA2/ETHYLENE RESPONSIVE  
71 FACTOR (AP2/ERF) transcription factor, the spikelet meristems lose their identity and  
72 determinacy while partially behaving as inflorescence meristems, producing lateral branches  
73 or multiple spikelets per rachis node (Poursarebani *et al.*, 2015). Similarly, in hexaploid  
74 wheat, variations for supernumerary spikelet formation were also found for the wheat *FRIZZY*  
75 *PANICLE* (*WFZP*) (Dobrovolskaya *et al.*, 2015), *Photoperiod-1* (*Ppd-1*) (Boden *et al.*, 2015),  
76 *TEOSINTE BRANCHED1* (*TB1*) (Dixon *et al.*, 2018), and *HOMEODOMAIN-2* (*HB-2*)  
77 (Dixon *et al.*, 2022). While branching spikes have considerably higher yield potential, i.e.,  
78 more spikelet number, they often suffer from grain weight trade-offs, as observed in the  
79 tetraploid Miracle-Wheat (Poursarebani *et al.*, 2015). Moreover, despite the increase in  
80 overall grain number per spike, spikelet fertility (grains per spikelet) decreased in response to  
81 spike-branching (Wolde *et al.*, 2021).

82

83 A large body of evidence suggests that wheat grain yield is an outcome of multiple trait-trait  
84 interactions mediated by developmental, physiological and environmental factors across the  
85 entire lifespan, although some stages are more critical than others (Brinton and Uauy, 2019;  
86 Guo *et al.*, 2017; Guo *et al.*, 2018a; Guo *et al.*, 2016; Guo *et al.*, 2018b; Murchie *et al.*, 2023;  
87 Reynolds *et al.*, 2022; Slafer *et al.*, 2023). They can broadly be classified as source and sink  
88 strength related, which jointly determine a particular genotype's assimilate production and  
89 reallocation potential. Typically, green tissues of the plant – both foliar (leaves) and non-foliar  
90 (peduncle, spikes) are the photosynthesising organs that act as ‘source’ for resource generation  
91 (Chang *et al.*, 2022; Molero and Reynolds, 2020). In the pre-anthesis phase, assimilates are  
92 partitioned to both vegetative biomass establishment and developing spikes – that determine  
93 the overall yield potential (Fischer, 2011; Slafer, 2003). The inflorescence architecture, *viz.*,  
94 spikelet number per spike, floret number per spikelet, carpel size, rachis length etc., are

95 determined before anthesis (Brinton and Uauy, 2019; Kirby and Appleyard, 1984; Sakuma  
96 and Schnurbusch, 2020). For instance, the ovary size during flowering regulated floret and  
97 grain survival in a panel of 30 wheat genotypes (Guo *et al.*, 2016). Likewise, the duration of  
98 leaf initiation, spikelet initiation and stem elongation period influenced spike fertility in bread  
99 wheat (Roychowdhury *et al.*, 2023). The source strength is often characterised by radiation  
100 use efficiency (RUE), i.e., the ability for light interception and biomass production (Acreche  
101 and Slafer, 2009; Molero *et al.*, 2019). However, the balance between the resources allocated  
102 to the ‘vegetative vs reproductive’ tissues largely dictates the yield potential (Dreccer *et al.*,  
103 2014; Ferrante *et al.*, 2013), a trait that has been under selection throughout the history of  
104 wheat breeding. The deployment of semi-dwarf *Rht-1* alleles (‘green revolution’ gene)  
105 significantly increased the harvest index and the grain number per unit area, possibly by  
106 enhancing the flow of assimilates (as the stem length is considerably reduced) to the juvenile  
107 spikes (Fischer and Stockman, 1986; Slafer *et al.*, 2023). However, other strategies might  
108 currently be required to further the resource allocation to early spike development as the semi-  
109 dwarf *Rht-1* allele is already a selection target (Peng *et al.*, 1999). Increasing the harvest index  
110 in the genotypes with high biomass (more robust source) might enhance grain yield (Sierra-  
111 Gonzalez *et al.*, 2021). Overall, the source strength from the terminal spikelet stage to  
112 anthesis majorly determines grain number and size in wheat.

113

114 After anthesis, the initiation of senescence in the foliar, but also non-foliar tissues drives  
115 extensive re-mobilization of resources into the developing grains; previous studies indicated  
116 that flag leaf and spike photosynthesis contribute to most of the assimilates during the grain  
117 filling phase (Distelfeld *et al.*, 2014; Molero and Reynolds, 2020). Hence, delayed flag leaf  
118 and spike senescence resulted in extended photosynthesis (functional stay-green), leading to  
119 higher grain yield (Chapman *et al.*, 2021b; Christopher *et al.*, 2016; Hassan *et al.*, 2021;  
120 Kichey *et al.*, 2007; Li *et al.*, 2022). However, the effect of delayed senescence was not  
121 consistent; for instance, prolonged photosynthesis influenced grain yield attributes only under  
122 low nitrogen conditions (Derkx *et al.*, 2012; Gaju *et al.*, 2011). The *GPC-B1* locus encoding  
123 *NO APICAL MERISTEM* (*NAM*), a *NAC* transcription factor is the major regulator of  
124 senescence rate in wheat (Uauy *et al.*, 2006); but, despite a 40% increase in flag leaf  
125 photosynthesis, the *NAM* RNAi wheat lines had no advantage in grain weight compared to the  
126 control plants (Borrill *et al.*, 2015). In addition, the stay-green phenotype of *gpc-A1* and *gpc-*  
127 *DI* mutants did not influence grain yield determinants (Avni *et al.*, 2014). However,  
128 (Chapman *et al.*, 2021b) reported that novel *NAM-1* allele that delayed senescence was

129 associated with 14% increase in the final grain weight, possibly by enhancing resource re-  
130 mobilization. A plausible explanation for such discrepancies might be that grain yield in  
131 wheat is largely sink-limited (Lichthardt *et al.*, 2020; Reynolds *et al.*, 2005); the surplus  
132 water-soluble carbons that remain in the stem at physiological maturity supports this  
133 hypothesis (Serrago *et al.*, 2013). Thus, a higher sink capacity might be essential to capitalise  
134 on the extended photosynthetic period during the grain filling phase (Lichthardt *et al.*, 2020).  
135 In this context, a reductionist approach that focusses on characterising individual component  
136 traits might assist in the deeper understanding of source-sink dynamics but also be integrated  
137 to pin-point favourable combinations of alleles/haplotypes for improving wheat grain yield  
138 (Brinton and Uauy, 2019; Reynolds *et al.*, 2022).

139

140 As Miracle-Wheat has a stronger sink (more spikelet number), we hypothesized that delimited  
141 post-anthesis source strength might explain the spike-branching induced trade-offs on  
142 spikelet fertility and grain weight. To examine this, we developed a bi-parental wheat  
143 population comprising about 385 RILs by crossing the spike-branching TRI 984 with an elite  
144 durum CIRNO C2008. The idea was to evaluate this population under field conditions for  
145 various architectural traits, as well as the senescence rate of the flag leaf, the peduncles and  
146 the spike (details are in ‘Materials and Methods’ section). In summary, our current study aims  
147 to explain: i. The relationship between senescence rate and trade-offs regulating grain yield  
148 (spike-branching–grain number–grain weight); ii. The underlying genetics of such trade-offs;  
149 iii. Favourable trait and allele combinations of relevant QTLs to balance grain yield trade-  
150 offs; and iv. Finally, to verify if spike-branching might be a potential selection target to  
151 enhance grain yield in wheat.

## 152 MATERIALS AND METHODS

153

### 154 Population development

155 A bi-parental population comprising 385 RILs was developed by crossing the spike-branching  
156 Miracle-Wheat accession, 'TRI 984' and elite durum from CIMMYT, 'CIRNO C2008'  
157 (hereafter referred to as 'CIRNO'). A modified speed breeding method ([Ghosh \*et al.\*, 2018](#);  
158 [Watson \*et al.\*, 2018](#)) was used for rapid generation advancement from F<sub>3</sub> to F<sub>5</sub>. Initially, the  
159 grains were sown in the 96 well trays and grown in standard long day conditions *viz.*, 16h  
160 light (19°C) and 8h dark (16°C) for about two weeks. Later, the trays were transferred to speed  
161 breeding conditions *viz.*, 22h light (22°C) and 2h dark (17°C) to accelerate the growth. The  
162 spikes were harvested at maturity, and a similar method was used for the next cycle. Finally,  
163 the obtained F<sub>5</sub> plants were multiplied under field conditions during the spring of 2020, and  
164 the resulting F<sub>6</sub> grains (RILs) were genotyped and phenotyped ([Fig. S1](#)).

165

### 166 Genotyping and linkage map construction

167 The parental lines and three F<sub>6</sub> grains per RIL were sown in 96 well trays and were grown in  
168 standard greenhouse conditions for about two weeks. Leaves were sampled at the two-leaf  
169 stage from all the seedlings and stored at -80°C until further use. During the sampling, the  
170 leaves from the three replications of a particular RIL were pooled, and genomic DNA was  
171 extracted. The DNA integrity was evaluated on agarose gel, after which about 50 ng/μl  
172 aliquots were prepared for the genotyping. Eventually, the 25K wheat array from SGS-  
173 TraitGenetics GmbH (<https://traitgenetics.com/index.php/disclaimer/2-uncategorised>) was  
174 used for genotyping the 385 RILs along with the parental lines. However, only the 18K  
175 markers scored to the A & B sub-genome were considered for further analysis; we found that  
176 5,089 markers were polymorphic ([Fig. S2A](#)). The linkage map was developed using the  
177 regression and maximum likelihood methods in JoinMap v4.1 ([Stam, 1993](#)). A subset of  
178 2,128 markers was prepared after filtering, *viz.*, without segregation distortion (determined  
179 based on Chi-squared test), <10% heterozygosity and <10% missing ([Fig. S2B&C](#)).  
180 Haldane's mapping function was used in the regression method, while the maximum  
181 likelihood method involved the spatial sampling thresholds of 0.1, 0.05, 0.03, 0.02 and 0.01  
182 with three optimisation rounds per sample. Outcomes from both these methods were used to  
183 determine the 14 linkage groups and final map order.

184

## 185 **Experimental design**

### 186 *Greenhouse conditions*

187 The genotypes were sown in 96 well trays with three replication each, and the two weeks old  
188 seedlings were vernalised at 4°C for one month. Then, the seedlings were transferred to 9 cm  
189 square pots, grown in standard long day conditions (16h light; 19°C & 8h dark; 16°C), and  
190 various traits were phenotyped. Standard fertilization was performed, and plants were treated  
191 with pesticides based on the requirement.

192

### 193 *Field conditions*

194 The genotypes were screened at IPK-Gatersleben (51°49'23"N, 11°17'13"E, 112m  
195 altitude) under field conditions for two growing seasons *viz.*, the F<sub>6</sub> derived RILs in the spring  
196 of 2021, and the F<sub>7</sub> derived RILs in the spring of 2022. They were grown in an  $\alpha$ -lattice  
197 design with three replications, while each 1.5 m<sup>2</sup> plot had six 20 cm spaced rows comprising  
198 two genotypes (three rows each). Standard agronomic and management practices were in  
199 place throughout the growth cycle; however, the experimental trial was completely rainfed.  
200 Besides, a subset of genotypes (about 250 F<sub>6</sub> derived RILs) in one replication was evaluated  
201 at the University of Hohenheim (48°42'50"N, 9°12'58"E, 400 m altitude) in 2022.

202

## 203 **Examining plant and spike architectural traits**

204 Plants from the inner rows (at least five measurements per plot) were considered for all the  
205 phenotyping except for grain yield per meter row, where the mean of all three rows of a  
206 particular genotype was measured. Days to heading (DTH) was determined at 'Zadoks 55',  
207 i.e. when half of the spike has emerged ([Zadoks et al., 1974](#)) in about 50% of the plants in a  
208 particular plot. Later, this was converted into growing degree days (GDD) to account for  
209 temperature gradients ([Miller et al., 2001](#)). The distance from the tip of the flag leaf to its base  
210 was considered as the flag leaf length, while the flag leaf width was the end-to-end horizontal  
211 distance at the middle of the leaf. Flag leaf verdancy was measured at eight different locations  
212 along the leaf ([Borrill et al., 2019](#)) at heading (both in the greenhouse and field) but also at 30  
213 days after heading (only in the greenhouse) using the SPAD-502 chlorophyll meter (Konica  
214 Minolta). In the field, flag leaf senescence was screened at 30 days after heading using a four-  
215 point severity scale from '1' indicating the least senescence to '4' for the highest senescence  
216 ([Fig. S3A](#)). The number of senesced peduncles per 10 peduncles was counted from the inner  
217 rows to determine peduncle senescence (%) ([Chapman et al., 2021a](#)). In this context, we

218 found a gradient of yellowness in the peduncle across the RILs; however, in the current study,  
219 this was not differentiated, i.e. we had only two classes – green and yellow (Fig. S3B). Days  
220 to maturity (DTM) was determined when most spikes turned yellow in a particular plot; later,  
221 this was converted to growing degree days similar to days to heading.

222

223 Spike weight, spike length (without awns) and straw biomass (dry weight of culm along with  
224 leaves) were measured after harvest. In addition, a scoring method was developed for  
225 estimating supernumerary spikelets (two spikelets per rachis node) and spike-branching (true  
226 branching with mini-spikes from the rachis nodes) (Fig. S4). '0' (standard spike), '1'  
227 (supernumerary spikelets only at the basal part of the spike), '2' (supernumerary spikelets until  
228 half of the spike), '3' (supernumerary spikelets throughout the spike) and '4' (proper  
229 branching). Floret number was measured from the non-branching genotypes from two  
230 spikelets at the centre of the spike at harvest. Besides, derived traits such as grains per  
231 spikelet, grain filling duration (Chapman *et al.*, 2021a), and harvest index was calculated as  
232 follows:

233

$$\textit{Grains per spikelet} = \frac{\textit{Grains per spike}}{\textit{Spikelet number per spike}}$$

234

$$\textit{Grain filling duration} = \textit{Days to maturity} - \textit{Days to heading}$$

235

$$\textit{Harvest index} = \frac{\textit{Grain weight per spike}}{\textit{Straw biomass} + \textit{Spike weight}}$$

236

237 'Marvin' digital grain analyser (GTA Sensorik GmbH, Neubrandenburg, Germany) was used  
238 to determine grains per spike, thousand-grain weight, grain length, and grain width. We also  
239 recorded the grain width and length of the parental lines manually using a Vernier calliper to  
240 reconfirm the observed trend from the 'Marvin' digital seed analyser (Fig. S5). All the above-  
241 mentioned traits were recorded at IPK-Gatersleben, while only the spike architectural traits  
242 were phenotyped from the experiment conducted at the University of Hohenheim.

243

#### 244 **Phenotypic and Genetic analyses**

245 Genstat 19 (VSN International, Hemel Hempstead, UK) and GraphPad Prism 9.3.1 (GraphPad  
246 Software, San Diego, California, USA) were used for all the statistical analyses. Ordinary



247 one-way ANOVA followed by Dunnett's multiple comparisons test was employed for  
248 multiple-range comparisons, whereas an unpaired *Student's t-test* was used to compare two  
249 groups. Pearson correlation was used to study the relationship among the traits of interest;  
250 besides, simple linear regression assisted in understanding the effect of a particular trait  
251 (explanatory variable) on another (response variable). The corresponding figures contain all  
252 the relevant details, such as P-value,  $R^2$ , and the number of samples compared.

253

254 QTL mapping was performed in Genstat 19 using the following criteria: i. step size of 10 cM,  
255 ii. minimum cofactor proximity of 50 cM, iii. minimum QTL separation distance of 30 cM  
256 and iv. genome wide significance ' $\alpha = 0.05$ '. Simple interval mapping (SIM) was performed  
257 as an initial scan to determine the positions of potential candidate QTL(s). These positions  
258 were used as cofactors for multiple rounds of composite interval mapping (CIM); CIM was  
259 repeated until similar results were obtained at least three consecutive times. Finally, QTL  
260 backward-selection was carried out after CIM to estimate various QTL effects, including the  
261 determination of QTL interval, high-value allele, additive effects, and phenotypic variance  
262 explained. The QTLs were visualised using MapChart 2.32 ([Voorrips, 2002](#)).

## 263 RESULTS

264

### 265 Spike-branching affects spikelet fertility and thousand-grain weight

266 Consistent with previous findings using different germplasm (Wolde *et al.*, 2021), despite  
267 having more spikelets, the spike-branching landrace ‘TRI 984’ had fewer florets per spikelet  
268 compared to the elite durum ‘CIRNO’ (Fig. 1A-D). However, we found no difference in grain  
269 number per five spikes, while a considerably reduced thousand-grain weight in TRI 984,  
270 associated with shorter grains was observed (Fig. 1E-H). Although CIRNO flowered earlier  
271 (Figure 1I), it had greener flag leaves at heading (Fig. 1J) and also after 30 days of heading  
272 (Fig. 1K) along with greener peduncles (Fig. 1L). Besides, CIRNO had longer but narrower  
273 flag leaves (Fig. 1M&N), fewer tillers (Fig. 1O), shorter spikes (Fig. 1P), shorter plant stature  
274 (Fig. 1Q) and less straw biomass as opposed to TRI 984. Furthermore, there was no difference  
275 in the average spike weight (n=5) (Fig. 1R), while CIRNO had more grain yield per five  
276 spikes (Fig. 1S). These observations indicate a clear difference in terms of assimilate  
277 production and resource reallocation into sink organs between the two genotypes. As  
278 expected, CIRNO, a widely cultivated modern durum variety, had delayed flag leaf and  
279 peduncle senescence (more extended grain filling period) and higher thousand-grain weight.  
280 On the other hand, the spike-branching landrace TRI 984 exhibited a relatively poor resource  
281 production and reallocation potential, *viz.*, a less verdant/green flag leaf at heading, and  
282 quicker senescence rate (shorter grain filling period), poor spikelet fertility and thousand-  
283 grain weight. Besides, the resources required to maintain the vegetative parts might be higher  
284 in the case of TRI 984 because of the taller plant architecture and longer rachis internodes  
285 than CIRNO. Hence, we phenotyped the corresponding landrace-elite recombinants (TRI 984  
286 x CIRNO) that vary in source-sink balance to obtain mechanistic insights into the negative  
287 effect of spike-branching on spikelet fertility and grain weight, two major components of the  
288 final grain yield.

289

### 290 Spikelet fertility and thousand-grain weight are associated with senescence rate

291 As expected, we witnessed a considerable diversity for all the plant and spike architectural  
292 traits (Fig. S6). Importantly, flag leaf and peduncle senescence rates were independent of the  
293 heading date; this implies that there is a possibility for the lines that flowered late to senesce  
294 early and vice-versa (Fig. 2A). The lines with delayed flag leaf senescence also had the  
295 tendency of retaining green/verdant peduncles for a longer duration (Fig. 2A). In addition, the

296 intensity of flag leaf greening (SPAD meter value) at heading had only a minor effect  
297 ( $R^2=0.031$ ;  $p=0.047$ ) on the progress of senescence (scored at 30 days after heading),  
298 indicating that these traits are largely independent (Fig. 2B). Flag leaf length and delay in  
299 senescence were positively related ( $R^2=0.046$ ;  $p=0.0042$ ), while flag leaf width did not  
300 influence the same (Fig. S7A&B). Moreover, we observed that the lines with more  
301 verdant/greener flag leaves at heading (higher SPAD value) also had a more significant  
302 number of florets per spikelet ( $R^2=0.085$ ;  $p=0.0014$ ), in line with the expected consequence of  
303 source strength on sink organ establishment before anthesis (Fig. S7C). Intriguingly, the  
304 number of florets and grains per spikelet, which is determined earlier, was associated with  
305 senescence rate, i.e., the lines with more florets and grains per spikelet displayed delayed flag  
306 leaf senescence ( $R^2=0.071$ ;  $p=0.0009$  &  $R^2=0.16$ ;  $p<0.0001$ ) (Figs. S7D & 2C). We mapped a  
307 QTL on Chr 5A (*bh<sup>1</sup>-A3*) influencing grains per spikelet and flag leaf/peduncle senescence  
308 rate, which explains the underlying genetic basis of such an exciting relationship (Table S1).  
309 This trend implies a plausible pleiotropic regulation that requires further validation. Besides,  
310 the delayed senescence rate had a positive effect on thousand-grain weight ( $R^2=0.11$ ;  
311  $p<0.0001$ ) (Fig. 2D). We realised that the observed increase in thousand-grain weight is  
312 primarily due to the change in grain width ( $R^2=0.097$ ;  $p<0.0001$ ) (Fig. 2E) and not grain  
313 length (Fig. S7E), implying that grain width is more plastic, influenced by resource  
314 reallocation compared to grain length. Nevertheless, it is clear that the longer duration of  
315 green flag leaf and peduncle is not simply ‘cosmetic’ – it influences grain yield determinants.  
316 This vital evidence supports our hypothesis that dissecting the source-sink relationship might  
317 have relevance in balancing the trade-offs that negatively regulate the final grain yield in  
318 ‘Miracle-Wheat’ like genotypes.

319

## 320 **Genetic basis of source-sink dynamics in ‘Miracle-Wheat’**

321

### 322 *The bh<sup>1</sup>-A1 locus underlies sink and source capacity*

323 Using a dosage-based scoring method (Fig. S4), we mapped a major effect QTL for spike-  
324 branching on Chr 2A (Fig. 3A, Table S1) that was tightly linked with the previously known  
325 locus *bh<sup>1</sup>-A1* (Poursarebani *et al.*, 2015). Regardless of the increase in spikelet number per  
326 spike owing to the lateral branching (Fig. 3B), there was no difference in the total grain  
327 number per spike (Fig. 3C). Moreover, the *bh<sup>1</sup>-A1* locus while inducing spike-branching, was  
328 also associated with a reduction in grain length (Fig. 3D) and thousand-grain weight (Fig. 3E).  
329 Besides, we found that flag leaf verdancy at heading was negatively affected (Fig. 3F), as

330 with spike length (Fig. 3G). In principle, the TRI 984 allele at the  $bh^l-A1$  locus induces spike-  
331 branching, but with a possible drawback on the source capacity. Overall, the spike-branching  
332 effect from  $bh^l-A1$  locus could not be translated into any advantages for the final grain yield.

333

### 334 ***bh<sup>l</sup>-A3, a novel spike-branching locus on Chr 5A reshapes source-sink dynamics***

335 We named the newly identified spike-branching modifier locus as ' $bh^l-A3$ ' following the  
336 previously known  $bh^l-A1$  (Poursarebani *et al.*, 2015) and  $bh^l-A2$  (Wolde *et al.*, 2021) loci.  
337 Interestingly, the spike-branching effect of the  $bh^l-A3$  locus (contributed by the CIRNO allele)  
338 manifests only in the presence of the mutated  $bh^l-A1$  allele (Fig. 4A; Fig. S8A-C; Table S1).  
339 We divided the RILs into two sub-groups for QTL mapping *viz.*, by fixing i.  $bh^l-A1$ , ii.  $BH^l-$   
340  $A1$  and the outcome confirm the epistasis of the  $bh^l-A3$  to  $bh^l-A1$  locus (Fig. S8A). Possibly,  
341 this indicates that the plasticity for spike-branching is introduced by  $bh^l-A1$ , i.e., it might be  
342 first essential to have  $bh^l-A1$  to disrupt the spikelet meristem identity and only then the  $bh^l-A3$   
343 locus might modify the branching intensity in the spikes. Moreover, in this region, we found  
344 co-localised QTLs for an array of traits influencing source-sink dynamics. The CIRNO allele  
345 contributed to spike-branching (Fig. 4B), delayed flag leaf senescence (Fig. 4C), more  
346 extended grain filling period (Fig. 4D), increased spikelet fertility (Fig. 4E) and grain yield  
347 per five spikes (Fig. 4F). Besides, we also found a subtle, yet positive effect on grain width  
348 (Fig. S9A), thousand-grain weight (Fig. 4G), florets per spikelet (Fig. S9B), straw biomass  
349 (Fig. S9C) and harvest index (Fig. S9D). Interestingly, we found that the observed variations  
350 in flag leaf senescence and thousand-grain weight were not dependent on the presence of  $bh^l-$   
351  $A1$  (Fig. S8D&E). This pattern might imply that the phenotypic variation explained by the 5A  
352 QTL hotspot for spike-branching rate and senescence might be the outcome of at least two  
353 different genes. Nevertheless, the more extended photosynthetic period translated into grain  
354 number increases only in the spike-branching RILs – when  $bh^l-A1$  is present (Fig. S8C).  
355 Taken together, this trend suggests that the favourable CIRNO allele ( $bh^l-A3$ ) mediates  
356 enhanced assimilate production and reallocation of the resources to sink organs, including the  
357 lateral branches/supernumerary spikelets because of longer grain filling duration.

358

### 359 ***GPC-B1 is the major determinant of senescence rate and thousand-grain weight***

360 A QTL on Chr 6B, which most likely is associated with  $GPC-B1$  (Uauy *et al.*, 2006),  
361 explained most of the observed phenotypic variance for the overall plant senescence rate (Fig.  
362 5A; Table S1). Likewise, it was found that mutations in the NAC domain of  $NAM-A1$  ( $GPC-$   
363  $A1$ ) delayed peduncle and flag leaf senescence (Harrington *et al.*, 2019). In the current study,

364 the CIRNO allele ensured delay in the flag leaf (Fig. 5B), peduncle (Fig. 5C) and spike  
365 senescence (days to maturity) (Fig. 5D). Therefore, there might be a possibility of more  
366 reallocation into the sink organs, leading to increase in grain width (Fig. 5E) and grain length  
367 (Fig. 5F). Accordingly, we observed a considerably higher thousand-grain weight in the RILs  
368 that senesce late (Fig. 5G). However, there was no meaningful difference in grain number per  
369 five spikes (Fig. S10A), straw biomass (Fig. S10B) and harvest index (Fig. S10C).  
370 Furthermore, our interaction analysis revealed that both *bh<sup>1</sup>-A1* (Fig. S11A-D) and *bh<sup>1</sup>-A3*  
371 (Fig. S12A-D) might function independent of *gpc-B1*.

372

### 373 *Specific additive and epistatic interactions may increase yield potential in spike-branching* 374 *genotypes*

375 As the QTLs on Chr 2A, 5A and 6B explain variations in key source-sink attributes, we  
376 analysed their various allelic combinations to understand better the trade-off among spike-  
377 branching, spikelet fertility and thousand-grain weight (Figs. 6A-H & 7). Interestingly, the  
378 spike-branching lines carrying *bh<sup>1</sup>-A1* and *bh<sup>1</sup>-A3* loci along with *gpc-B1* had higher grain  
379 number per five spikes (Fig. 6A, E) and were associated with a delay in post-anthesis flag leaf  
380 senescence. Eventually, they had higher thousand grain weight (Fig. 6B), higher grain yield  
381 per five spikes (Fig. 6C, G) and enhanced grain yield (per meter row) (Fig. 6D) as opposed to  
382 the early senescing branched spike RILs (*bh<sup>1</sup>-A1+BH<sup>1</sup>-A3+GPC-B1*) across all the three  
383 environments *viz.*, IPK-2021, IPK-2022 (Fig. 6A-D) and University of Hohenheim-2022 (Fig.  
384 6E & G). However, the difference in thousand-grain weight was observed only at IPK (Figs.  
385 6B & S13A, B), while this effect was absent in Hohenheim (Figs. 6F & S13C, D).

## 386 DISCUSSION

387 Over the course of domestication and breeding, grain yield determinants such as grain number  
388 and grain weight, but also grain quality traits under both favourable and stressful conditions,  
389 were the primary selection targets in all major cereal crops, including wheat (McSteen and  
390 Kellogg, 2022; Voss-Fels *et al.*, 2019). For instance, the selection of the semi-dwarf *Rht-1*  
391 allele was a vital driver of the ‘green revolution’ in wheat (Peng *et al.*, 1999); likewise, the  
392 prevalence of the less functional *GNI-A1* allele enabled higher floret fertility in the modern  
393 wheat cultivars (Golan *et al.*, 2019; Sakuma *et al.*, 2019). However, substantial genetic yield  
394 gaps [the difference between the genetic yield potential of a crop in a particular environment  
395 to that of the potential yield of the current local cultivar] suggest the presence of untapped  
396 genetic diversity for enhancing wheat grain yield (Senapati *et al.*, 2022). Grain yield can be  
397 optimised by fine-tuning various developmental processes (Mathan *et al.*, 2016) and  
398 introducing ‘drastic variations’ in crop breeding (Abbai *et al.*, 2020). The genetic pathways  
399 that coordinate inflorescence architecture are dissected in staple grasses (Kellogg, 2022;  
400 Koppolu *et al.*, 2022), which might have relevance for minimising the genetic yield gap.

401  
402 Here, we considered the case of spike-branching Miracle-Wheat as a potential option for  
403 increasing sink strength (more spikelets and grains per spike). However, the genetic analysis  
404 of the TRI 984 x CIRNO recombinants revealed a couple of significant limitations. Firstly, we  
405 recorded inconsistencies in the expressivity (degree) of spike-branching (in the RILs that  
406 carried similar QTLs/alleles; Figs. 3B, 4B & S8B). Although final grain yield is the function  
407 of various events, it is conceivable that the relevant source-related component traits in the pre-  
408 anthesis (yield construction) phase (Murchie *et al.*, 2023; Slafer *et al.*, 2023) might play a  
409 significant role in determining the yield potential. Expectedly, we observed that the RILs that  
410 flowered late were the ones with more straw biomass and, in turn, showed increased spike-  
411 branching in the presence of relevant QTLs (Fig. S7F-H). Hence, a longer duration of the pre-  
412 anthesis phase might have enabled increased resource production and partitioning into the  
413 developing juvenile spikes, resulting in better expressivity of the spike-branching phenotype.  
414 This implies that spike-branching winter wheat might have higher yield potential given the  
415 longer duration of pre-anthesis phase, suggesting a possibility of extending the current  
416 findings to other populations. However, we also observed differences in the degree of spike-  
417 branching within the same genotype. Similarly, in an earlier study (Wolde *et al.*, 2021)  
418 reported that the expressivity of spike-branching in a particular genotype was higher in the  
419 outer rows as opposed to the inner rows of the plot. However, no new QTLs were mapped that

420 specifically explained such differences. In principle, field-grown plants experience  
421 competition for various resources, including light (Huber *et al.*, 2021; Postma *et al.*, 2021),  
422 especially in the inner rows (Rebetzke *et al.*, 2014). In this regard, future studies investigating  
423 the response of various source and sink component traits in high-density plots or simulated  
424 canopy shade (Golan *et al.*, 2022) are required to uncover the genetic framework of plant-  
425 plant competition and its effect on spike-branching expressivity.

426

427 Next, (Poursarebani *et al.*, 2015) reported that the *bh<sup>1</sup>-A1* locus increases grain number, but  
428 with a grain weight trade-off. Likewise, we also observed considerably smaller grains in the  
429 spike-branching genotypes (Figs. 1F&3E). However, in the current study, the *bh<sup>1</sup>-A1* locus  
430 showed no increase in the final grain number because of the spike-branching, suggesting poor  
431 spikelet fertility (Figs. 1E&3C). Interestingly, there was no thousand-grain weight trade-off in  
432 the spike-branching Bellaroi x TRI19165 semi-dwarf RILs (Wolde *et al.*, 2021) and also in  
433 the Floradur NILs with supernumerary spikelets (Wolde *et al.*, 2019); thus, warranting the  
434 analysis of source-sink dynamics in the non-canonical spike forms. Here, it is vital to  
435 emphasise the relevance of the post-anthesis (yield realisation) events, chiefly related to the  
436 transfer of assimilates to the previously established sink organs during grain filling (Murchie  
437 *et al.*, 2023; Slafer *et al.*, 2023). In this context, the senescence rate might have an impact on  
438 grain filling duration (Chapman *et al.*, 2021b; Christopher *et al.*, 2016; Hassan *et al.*, 2021;  
439 Kichey *et al.*, 2007; Li *et al.*, 2022), i.e., extended photosynthesis leading to more assimilate  
440 production and allocation to the developing grains. But, final grain weight was not strongly  
441 related with starch/sugar levels or the corresponding enzymatic capacity in 54 diverse wheat  
442 genotypes, but it might be a function of early developmental events (Fahy *et al.*, 2018). In the  
443 current study, we report that higher grain number per spikelet (Fig. 2C) and grain weight (Fig.  
444 2D) is associated with delayed flag leaf, peduncle and spike senescence. As expected, the  
445 observed effect of senescence rate might be because of the differences in various sink  
446 strength-related traits such as rachis length, spikelet number per spike (spike-branching), and  
447 floret number per spikelet in our RIL population (Fig. S6). As the sink strength increased,  
448 perhaps the extended photosynthetic period was meaningful for influencing the final grain  
449 yield. This trend further establishes the rationale for understanding the genetic and molecular  
450 framework of source and sink-related component traits to enable grain yield gains (Brinton  
451 and Uauy, 2019; Reynolds *et al.*, 2022). With this, the favourable alleles explaining the  
452 source-sink dynamics might assist in balancing the trade-offs among spikelet fertility and  
453 grain weight in the spike-branching genotypes. Here, we analysed the interactions among *bh<sup>1</sup>-*

454 *AI*, *bh<sup>t</sup>-A3*, and *gpc-B1*; the *bh<sup>t</sup>-A1* and *bh<sup>t</sup>-A3* loci regulated spike-branching, but also source  
455 strength, while *gpc-B1* delayed senescence rate and increased thousand-grain weight (Figs.  
456 6&7). Transcriptional analysis of WT and *NAM (GPC)* RNAi lines revealed differential  
457 regulation of genes related to various processes, including photosynthesis and nitrogen  
458 metabolism, during flag leaf senescence (Andleeb *et al.*, 2022). Our preliminary genetic  
459 evidence indicates that *bh<sup>t</sup>-A1* and *gpc-B1* function independently (Fig. S11); however, it  
460 might be interesting to verify the presence of any possible common downstream targets of  
461 *bh<sup>t</sup>-A1* and *gpc-B1* to uncover subtler aspects of their regulation. In any case, as speculated,  
462 the spike-branching RILs with an extended photosynthetic period (delayed senescence) had  
463 considerably higher grain yield (per meter row) as opposed to branched spike genotypes that  
464 senesced early (Fig. 6D). In this case, the stay-green spike-branching RILs were associated  
465 with 15.82% (SEM:  $\pm 5.96\%$ ) more grains per spike (Fig. 6A). However, we believe that the  
466 grain number difference might be due to the interaction between floret number and flag leaf  
467 senescence, which is mediated by the *bh<sup>t</sup>-A3* locus; the CIRNO allele increased florets per  
468 spikelet (Fig. S9B) and delayed flag leaf senescence (Fig. 4C). The pre-anthesis floret  
469 degeneration and post-anthesis flag leaf senescence might share a common genetic basis  
470 thereby primarily affecting the tip of the respective organs, i.e. spikelet meristem/rachilla and  
471 flag leaf, respectively. Therefore, it is conceivable that the underlying gene might have a  
472 pleiotropic effect on floret survival and flag leaf senescence, thus explaining the grain  
473 number difference. Eventually at IPK-Gatersleben (2021 and 2022), we found a 9.35% (SEM:  
474  $\pm 3.58\%$ ) increase in average grain weight (Fig. 6B) in the spike-branching genotypes that  
475 senesce late. The 2.61% (SEM:  $\pm 0.91\%$ ) rise in grain width (Fig. S13A) majorly contributed  
476 to the grain weight difference, as the grain length remained unaffected (Fig. S13B).  
477 Incidentally, it was found that grain width increased during wheat evolution under  
478 domestication (Gegas *et al.*, 2010). Besides, it might be interesting to evaluate the effect of  
479 expansin genes in the spike-branching lines as the ectopic expression of *TaExpA6* increased  
480 grain length (Calderini *et al.*, 2021).

481

482 However, we would like to emphasise certain limitations in our experimental setup: we used  
483 relatively small plots (only 1.5 m<sup>2</sup>) with two genotypes in one plot; therefore, the influence of  
484 the border effect (Rebetzke *et al.*, 2014) cannot be excluded in grain yield per row  
485 calculations and besides, the evaluated population are landrace-elite recombinants, that might  
486 create another bias in the observed yield increase. Although there is a significant increase in  
487 grain number per five spikes in the stay-green spike-branching recombinants, the actual yield



488 advantage might be better understood by evaluating the effect in isogenic backgrounds (NILs)  
489 and larger plots in multiple environments. In this context, we are developing spike-branching  
490 CIRNO NILs for these follow-up experiments. Another trade-off associated with extending  
491 the grain filling duration that is not addressed here is its likely impact on grain nutrition  
492 profile; the functional *NAM-B1* allele improves grain protein, iron and zinc content by  
493 accelerating the senescence process (Uauy *et al.*, 2006). Then, the status of the stay-green  
494 spike-branching RILs under unfavourable conditions is also beyond the scope of the current  
495 study; however, previous reports indicate a positive effect of stay-green phenotypes on wheat  
496 grain yield under drought and heat (Lopes and Reynolds, 2012). Similarly, delay in  
497 senescence led to higher grain number and tiller number but lower thousand-grain weight  
498 under nitrogen-limiting conditions (Derx *et al.*, 2012). In addition, a recent simulation study  
499 indicates the advantage of cultivating late-maturing wheat varieties in future climate scenarios  
500 (Minoli *et al.*, 2022), implying that a delay in senescence rate might eventually be beneficial.

501

## 502 CONCLUSION

503 The physiological and genetic analysis of TRI 984xCIRNO recombinants revealed that i.  
504 extended verdant flag leaf, peduncle and spike led to higher grain yield per spike as the traits  
505 influencing sink strength segregated, including spike-branching; ii. we identified three QTL  
506 regions—on Chr 2A (*bh<sup>1</sup>-A1*), Chr 5A (*bh<sup>1</sup>-A3*) and Chr 6B (*gpc-B1*) that regulated source-sink  
507 strength in the current bi-parental population; iii. upon analysing their various allele  
508 combinations, it was found that an increase in grain number and grain weight is  
509 predominantly possible among the stay-green, spike-branching genotypes. iv. Finally, as  
510 wheat grain yield is also sink-limited, we propose that introducing spike-branching as a  
511 breeding target might enable advancing genetic gains while minimising the gap between  
512 genetic yield potential and the actual realised yield. Although we provide insights into  
513 balancing spike-branching–spikelet fertility–grain weight trade-offs, it is still necessary to  
514 understand the basis of inconsistencies in the degree of spike-branching within the same  
515 genotype but also in diverse genetic backgrounds. To achieve this, tracking the source-  
516 strength dynamics during the early developmental stages might be necessary.

517 **ACKNOWLEDGEMENT**

518 We are grateful to Franziska Backhaus, Corinna Trautewig, Kerstin Wolf, Sonja Allner, Ellen  
519 Weiss, Ingrid Marscheider, and Angelika Püschel for their excellent technical assistance;  
520 Roop Kamal for helping with the field design; Prof. Nils Stein for his valuable comments on  
521 the project; Dr. Gemma Molero for sharing CIRNO grains; all members of Plant Architecture  
522 research group for the fruitful discussions and also for the support during harvest; Peter  
523 Schreiber and the team of gardeners for managing the field operations.

524

525 **AUTHOR CONTRIBUTIONS**

526 TS acquired funding and supervised the project. RA continued to develop the population  
527 further, generated the data, analysed and interpreted the results. TS and GG guided in analysis  
528 and interpretation of the results. FHL conducted the field experiment at the University of  
529 Hohenheim. RA wrote the manuscript with inputs from all the co-authors.

530

531 **CONFLICT OF INTEREST**

532 The authors declare that there is no conflict of interest.

533

534 **FUNDING**

535 TS thanks the European Fund for Regional Development (EFRE), the State of Saxony-Anhalt  
536 within the ALIVE project, grant no. ZS/2018/09/94616, the HEISENBERG Program of the  
537 German Research Foundation (DFG), grant no. SCHN 768/15-1 and the IPK core budget for  
538 supporting this study. GG was funded through the Alexander von Humboldt Foundation  
539 postdoctoral fellowship program.

## REFERENCES

- Abbai R, Singh VK, Snowdon RJ, Kumar A, Schnurbusch T.** 2020. Seeking Crops with Balanced Parts for the Ideal Whole. *Trends in Plant Science* **25**, 1189-1193.
- Acreche MM, Slafer GA.** 2009. Grain weight, radiation interception and use efficiency as affected by sink-strength in Mediterranean wheats released from 1940 to 2005. *Field Crops Research* **110**, 98-105.
- Andleeb T, Knight E, Borrill P.** 2022. Wheat NAM genes regulate the majority of early monocarpic senescence transcriptional changes including nitrogen remobilization genes. *G3 Genes|Genomes|Genetics*.
- Avni R, Zhao R, Pearce S, Jun Y, Uauy C, Tabbita F, Fahima T, Slade A, Dubcovsky J, Distelfeld A.** 2014. Functional characterization of GPC-1 genes in hexaploid wheat. *Planta* **239**, 313-324.
- Boden SA, Cavanagh C, Cullis BR, Ramm K, Greenwood J, Jean Finnegan E, Trevaskis B, Swain SM.** 2015. Ppd-1 is a key regulator of inflorescence architecture and paired spikelet development in wheat. *Nature Plants* **1**, 14016.
- Borrill P, Fahy B, Smith AM, Uauy C.** 2015. Wheat grain filling is limited by grain filling capacity rather than the duration of flag leaf photosynthesis: a case study using NAM RNAi plants. *PLoS One* **10**, e0134947.
- Borrill P, Harrington SA, Simmonds J, Uauy C.** 2019. Identification of Transcription Factors Regulating Senescence in Wheat through Gene Regulatory Network Modelling. *Plant Physiol* **180**, 1740-1755.
- Brinton J, Uauy C.** 2019. A reductionist approach to dissecting grain weight and yield in wheat. *J Integr Plant Biol* **61**, 337-358.
- Calderini DF, Castillo FM, Arenas M A, Molero G, Reynolds MP, Craze M, Bowden S, Milner MJ, Wallington EJ, Dowle A.** 2021. Overcoming the trade-off between grain weight and number in wheat by the ectopic expression of expansin in developing seeds leads to increased yield potential. *New Phytologist* **230**, 629-640.
- Chang TG, Shi Z, Zhao H, Song Q, He Z, Van Rie J, Den Boer B, Galle A, Zhu XG.** 2022. 3dCAP-Wheat: An Open-Source Comprehensive Computational Framework Precisely Quantifies Wheat Foliar, Nonfoliar, and Canopy Photosynthesis. *Plant Phenomics* **2022**, 9758148.
- Chapman EA, Orford S, Lage J, Griffiths S.** 2021a. Capturing and Selecting Senescence Variation in Wheat. *Front Plant Sci* **12**, 638738.
- Chapman EA, Orford S, Lage J, Griffiths S.** 2021b. Delaying or delivering: identification of novel NAM-1 alleles that delay senescence to extend wheat grain fill duration. *Journal of experimental botany* **72**, 7710-7728.
- Christopher JT, Christopher MJ, Borrell AK, Fletcher S, Chenu K.** 2016. Stay-green traits to improve wheat adaptation in well-watered and water-limited environments. *Journal of experimental botany* **67**, 5159-5172.
- Derkx AP, Orford S, Griffiths S, Foulkes MJ, Hawkesford MJ.** 2012. Identification of differentially Senescing mutants of wheat and impacts on yield, biomass and nitrogen Partitioning F. *Journal of integrative plant biology* **54**, 555-566.
- Distelfeld A, Avni R, Fischer AM.** 2014. Senescence, nutrient remobilization, and yield in wheat and barley. *Journal of experimental botany* **65**, 3783-3798.

- Dixon LE, Greenwood JR, Bencivenga S, Zhang P, Cockram J, Mellers G, Ramm K, Cavanagh C, Swain SM, Boden SA.** 2018. TEOSINTE BRANCHED1 Regulates Inflorescence Architecture and Development in Bread Wheat (*Triticum aestivum*). *Plant Cell* **30**, 563-581.
- Dixon LE, Pasquariello M, Badgami R, Levin KA, Poschet G, Ng PQ, Orford S, Chayut N, Adamski NM, Brinton J, Simmonds J, Steuernagel B, Searle IR, Uauy C, Boden SA.** 2022. MicroRNA-resistant alleles of HOMEBOX DOMAIN-2 modify inflorescence branching and increase grain protein content of wheat. *Sci Adv* **8**, eabn5907.
- Dobrovolskaya O, Pont C, Sibout R, Martinek P, Badaeva E, Murat F, Chosson A, Watanabe N, Prat E, Gautier N, Gautier V, Poncet C, Orlov YL, Krasnikov AA, Berges H, Salina E, Laikova L, Salse J.** 2015. FRIZZY PANICLE drives supernumerary spikelets in bread wheat. *Plant Physiol* **167**, 189-199.
- Dreccer MF, Wockner KB, Palta JA, McIntyre CL, Borgognone MG, Bourgault M, Reynolds M, Miralles DJ.** 2014. More fertile florets and grains per spike can be achieved at higher temperature in wheat lines with high spike biomass and sugar content at booting. *Functional Plant Biology* **41**, 482-495.
- Fahy B, Siddiqui H, David LC, Powers SJ, Borrill P, Uauy C, Smith AM.** 2018. Final grain weight is not limited by the activity of key starch-synthesising enzymes during grain filling in wheat. *Journal of experimental botany* **69**, 5461-5475.
- Ferrante A, Savin R, Slafer GA.** 2013. Floret development and grain setting differences between modern durum wheats under contrasting nitrogen availability. *Journal of experimental botany* **64**, 169-184.
- Fischer R.** 2011. Wheat physiology: a review of recent developments. *Crop and Pasture Science* **62**, 95-114.
- Fischer R, Stockman Y.** 1986. Increased kernel number in Norin 10-derived dwarf wheat: evaluation of the cause. *Functional Plant Biology* **13**, 767-784.
- Gaju O, Allard V, Martre P, Snape J, Heumez E, LeGouis J, Moreau D, Bogard M, Griffiths S, Orford S.** 2011. Identification of traits to improve the nitrogen-use efficiency of wheat genotypes. *Field Crops Research* **123**, 139-152.
- Gegas VC, Nazari A, Griffiths S, Simmonds J, Fish L, Orford S, Sayers L, Doonan JH, Snape JW.** 2010. A Genetic Framework for Grain Size and Shape Variation in Wheat *The Plant Cell* **22**, 1046-1056.
- Ghosh S, Watson A, Gonzalez-Navarro OE, Ramirez-Gonzalez RH, Yanes L, Mendoza-Suarez M, Simmonds J, Wells R, Rayner T, Green P, Hafeez A, Hayta S, Melton RE, Steed A, Sarkar A, Carter J, Perkins L, Lord J, Tester M, Osbourn A, Moscou MJ, Nicholson P, Harwood W, Martin C, Domoney C, Uauy C, Hazard B, Wulff BBH, Hickey LT.** 2018. Speed breeding in growth chambers and glasshouses for crop breeding and model plant research. *Nat Protoc* **13**, 2944-2963.
- Golan G, Abbai R, Schnurbusch T.** 2022. Exploring the trade-off between individual fitness and community performance of wheat crops using simulated canopy shade. *Plant, Cell & Environment*.
- Golan G, Ayalon I, Perry A, Zimran G, Ade-Ajayi T, Mosquna A, Distelfeld A, Peleg Z.** 2019. GNI-A1 mediates trade-off between grain number and grain weight in tetraploid wheat. *Theoretical and Applied Genetics* **132**, 2353-2365.

- Guo Z, Chen D, Alqudah AM, Röder MS, Ganal MW, Schnurbusch T.** 2017. Genome-wide association analyses of 54 traits identified multiple loci for the determination of floret fertility in wheat. *New Phytologist* **214**, 257-270.
- Guo Z, Liu G, Röder MS, Reif JC, Ganal MW, Schnurbusch T.** 2018a. Genome-wide association analyses of plant growth traits during the stem elongation phase in wheat. *Plant Biotechnology Journal* **16**, 2042-2052.
- Guo Z, Slafer GA, Schnurbusch T.** 2016. Genotypic variation in spike fertility traits and ovary size as determinants of floret and grain survival rate in wheat. *Journal of experimental botany* **67**, 4221-4230.
- Guo Z, Zhao Y, Röder MS, Reif JC, Ganal MW, Chen D, Schnurbusch T.** 2018b. Manipulation and prediction of spike morphology traits for the improvement of grain yield in wheat. *Scientific reports* **8**, 14435.
- Harrington SA, Overend LE, Cobo N, Borrill P, Uauy C.** 2019. Conserved residues in the wheat (*Triticum aestivum*) NAM-A1 NAC domain are required for protein binding and when mutated lead to delayed peduncle and flag leaf senescence. *BMC Plant Biology* **19**, 407.
- Hassan MA, Yang M, Rasheed A, Tian X, Reynolds M, Xia X, Xiao Y, He Z.** 2021. Quantifying senescence in bread wheat using multispectral imaging from an unmanned aerial vehicle and QTL mapping. *Plant physiology* **187**, 2623-2636.
- Huber M, Nieuwendijk NM, Pantazopoulou CK, Pierik R.** 2021. Light signalling shapes plant-plant interactions in dense canopies. *Plant, Cell & Environment* **44**, 1014-1029.
- Kellogg EA.** 2022. Genetic control of branching patterns in grass inflorescences. *Plant Cell* **34**, 2518-2533.
- Kichey T, Hirel B, Heumez E, Dubois F, Le Gouis J.** 2007. In winter wheat (*Triticum aestivum* L.), post-anthesis nitrogen uptake and remobilisation to the grain correlates with agronomic traits and nitrogen physiological markers. *Field Crops Research* **102**, 22-32.
- Kirby E, Appleyard M.** 1984. *Cereal development guide*, 2nd edn. Stoneleigh: National Agricultural Centre Arable Unit.
- Koppolu R, Chen S, Schnurbusch T.** 2022. Evolution of inflorescence branch modifications in cereal crops. *Curr Opin Plant Biol* **65**, 102168.
- Koppolu R, Schnurbusch T.** 2019. Developmental pathways for shaping spike inflorescence architecture in barley and wheat. *J Integr Plant Biol* **61**, 278-295.
- Li H, Liu H, Hao C, Li T, Liu Y, Wang X, Yang Y, Zheng J, Zhang X.** 2022. The auxin response factor TaARF15-A1 negatively regulates senescence in common wheat (*Triticum aestivum* L.). *Plant physiology*.
- Lichthardt C, Chen T-W, Stahl A, Stützel H.** 2020. Co-evolution of sink and source in the recent breeding history of winter wheat in Germany. *Frontiers in plant science* **10**, 1771.
- Lopes MS, Reynolds MP.** 2012. Stay-green in spring wheat can be determined by spectral reflectance measurements (normalized difference vegetation index) independently from phenology. *Journal of experimental botany* **63**, 3789-3798.
- Mathan J, Bhattacharya J, Ranjan A.** 2016. Enhancing crop yield by optimizing plant developmental features. *Development* **143**, 3283-3294.
- McSteen P, Kellogg EA.** 2022. Molecular, cellular, and developmental foundations of grass diversity. *Science* **377**, 599-602.

- Miller P, Lanier W, Brandt S.** 2001. Using growing degree days to predict plant stages. Ag/Extension Communications Coordinator, Communications Services, Montana State University-Bozeman, Bozeman, MO.
- Minoli S, Jägermeyr J, Asseng S, Urfels A, Müller C.** 2022. Global crop yields can be lifted by timely adaptation of growing periods to climate change. *Nature Communications* **13**, 1-10.
- Molero G, Joynson R, Pinera-Chavez FJ, Gardiner LJ, Rivera-Amado C, Hall A, Reynolds MP.** 2019. Elucidating the genetic basis of biomass accumulation and radiation use efficiency in spring wheat and its role in yield potential. *Plant Biotechnology Journal* **17**, 1276-1288.
- Molero G, Reynolds MP.** 2020. Spike photosynthesis measured at high throughput indicates genetic variation independent of flag leaf photosynthesis. *Field Crops Research* **255**, 107866.
- Murchie EH, Reynolds M, Slafer GA, Foulkes MJ, Acevedo-Siaca L, McAusland L, Sharwood R, Griffiths S, Flavell RB, Gwyn J, Sawkins M, Carmo-Silva E.** 2023. A 'wiring diagram' for source strength traits impacting wheat yield potential. *J Exp Bot* **74**, 72-90.
- Peng J, Richards DE, Hartley NM, Murphy GP, Devos KM, Flintham JE, Beales J, Fish LJ, Worland AJ, Pelica F.** 1999. 'Green revolution' genes encode mutant gibberellin response modulators. *Nature* **400**, 256-261.
- Postma JA, Hecht VL, Hikosaka K, Nord EA, Pons TL, Poorter H.** 2021. Dividing the pie: A quantitative review on plant density responses. *Plant, Cell & Environment* **44**, 1072-1094.
- Poursarebani N, Seidensticker T, Koppolu R, Trautewig C, Gawronski P, Bini F, Govind G, Rutten T, Sakuma S, Tagiri A, Wolde GM, Youssef HM, Battal A, Ciannamea S, Fusca T, Nussbaumer T, Pozzi C, Borner A, Lundqvist U, Komatsuda T, Salvi S, Tuberosa R, Uauy C, Sreenivasulu N, Rossini L, Schnurbusch T.** 2015. The Genetic Basis of Composite Spike Form in Barley and 'Miracle-Wheat'. *Genetics* **201**, 155-165.
- Rebetzke GJ, Fischer RTA, Van Herwaarden AF, Bonnett DG, Chenu K, Rattey AR, Fettell NA.** 2014. Plot size matters: Interference from intergenotypic competition in plant phenotyping studies. *Functional Plant Biology* **41**, 107-118.
- Reynolds M, Pellegrineschi A, Skovmand B.** 2005. Sink limitation to yield and biomass: a summary of some investigations in spring wheat. *Annals of Applied Biology* **146**, 39-49.
- Reynolds M, Slafer G, Foulkes J, Griffiths S, Murchie E, Carmo-Silva E, Asseng S, Chapman S, Sawkins M, Gwyn J, Flavell R.** 2022. A wiring diagram to integrate physiological traits of wheat yield potential. *Nat. Food* **3**, 318-324.
- Roychowdhury R, Zilberman O, Chandrasekhar K, Curzon AY, Nashef K, Abbo S, Slafer GA, Bonfil DJ, Ben-David R.** 2023. Pre-anthesis spike growth dynamics and its association to yield components among elite bread wheat cultivars (*Triticum aestivum* L. spp.) under Mediterranean climate. *bioRxiv*.
- Sakuma S, Golan G, Guo Z, Ogawa T, Tagiri A, Sugimoto K, Bernhardt N, Brassac J, Mascher M, Hensel G, Ohnishi S, Jinno H, Yamashita Y, Ayalon I, Peleg Z, Schnurbusch T, Komatsuda T.** 2019. Unleashing floret fertility in wheat through the mutation of a homeobox gene. *Proceedings of the National Academy of Sciences* **116**, 5182-5187.

- Sakuma S, Schnurbusch T.** 2020. Of floral fortune: tinkering with the grain yield potential of cereal crops. *New Phytol* **225**, 1873-1882.
- Senapati N, Semenov MA, Halford NG, Hawkesford MJ, Asseng S, Cooper M, Ewert F, van Ittersum MK, Martre P, Olesen JE.** 2022. Global wheat production could benefit from closing the genetic yield gap. *Nature Food* **3**, 532-541.
- Serrago RA, Alzueta I, Savin R, Slafer GA.** 2013. Understanding grain yield responses to source–sink ratios during grain filling in wheat and barley under contrasting environments. *Field Crops Research* **150**, 42-51.
- Sierra-Gonzalez A, Molero G, Rivera-Amado C, Babar MA, Reynolds MP, Foulkes MJ.** 2021. Exploring genetic diversity for grain partitioning traits to enhance yield in a high biomass spring wheat panel. *Field Crops Research* **260**, 107979.
- Slafer G.** 2003. Genetic basis of yield as viewed from a crop physiologist's perspective. *Annals of Applied Biology* **142**, 117-128.
- Slafer GA, Foulkes MJ, Reynolds MP, Murchie EH, Carmo-Silva E, Flavell R, Gwyn J, Sawkins M, Griffiths S.** 2023. A 'wiring diagram' for sink strength traits impacting wheat yield potential. *J Exp Bot* **74**, 40-71.
- Stam P.** 1993. Construction of integrated genetic linkage maps by means of a new computer package: Join Map. *Plant J* **3**, 739-744.
- Uauy C, Distelfeld A, Fahima T, Blechl A, Dubcovsky J.** 2006. A NAC gene regulating senescence improves grain protein, zinc, and iron content in wheat. *Science* **314**, 1298-1301.
- Voorrips RE.** 2002. MapChart: software for the graphical presentation of linkage maps and QTLs. *J Hered* **93**, 77-78.
- Voss-Fels KP, Stahl A, Wittkop B, Lichthardt C, Nagler S, Rose T, Chen T-W, Zetzsche H, Seddig S, Majid Baig M.** 2019. Breeding improves wheat productivity under contrasting agrochemical input levels. *Nature Plants* **5**, 706-714.
- Watson A, Ghosh S, Williams MJ, Cuddy WS, Simmonds J, Rey MD, Asyraf Md Hatta M, Hinchliffe A, Steed A, Reynolds D, Adamski NM, Breakspear A, Korolev A, Rayner T, Dixon LE, Riaz A, Martin W, Ryan M, Edwards D, Batley J, Raman H, Carter J, Rogers C, Domoney C, Moore G, Harwood W, Nicholson P, Dieters MJ, DeLacy IH, Zhou J, Uauy C, Boden SA, Park RF, Wulff BBH, Hickey LT.** 2018. Speed breeding is a powerful tool to accelerate crop research and breeding. *Nat Plants* **4**, 23-29.
- Wolde GM, Mascher M, Schnurbusch T.** 2019. Genetic modification of spikelet arrangement in wheat increases grain number without significantly affecting grain weight. *Molecular Genetics and Genomics* **294**, 457-468.
- Wolde GM, Schreiber M, Trautewig C, Himmelbach A, Sakuma S, Mascher M, Schnurbusch T.** 2021. Genome-wide identification of loci modifying spike-branching in tetraploid wheat. *Theor Appl Genet* **134**, 1925-1943.
- Zadoks J, Chang T, Konzak C.** 1974. Decimal code for the growth-stages of cereals. *Weed Res.* **14**, 415-421.

## Main figure legends

**Fig. 1.** TRI 984 has a poor source-sink balance as opposed to CIRNO. (A) Spike-branching phenotype of TRI 984 and (B) Standard spike of CIRNO. (C) Spikelet from the central part of the TRI 984 main rachis shows reduced florets relative to (D) a spikelet from a similar position in CIRNO. (E) Despite having more spikelets, there is no increase in grain number per 5 spikes in TRI 984. (F-H) However, the grains are smaller in TRI 984, leading to a reduction in thousand-grain weight. (I) TRI 984 exhibited delayed heading, (J) lower flag leaf verdancy at heading, (K, L) accelerated flag leaf and peduncle senescence. TRI 984 had (M, N) shorter but wider flag leaves, (O) more tillers at booting (under greenhouse conditions), (P) longer spikes, (Q) taller plant architecture. (R) There was no difference in spike weight. However, (S) grain yield per five spikes was reduced in TRI 984 compared to CIRNO.

**Fig. 2.** Functional 'Stay-green' phenotype was observed in the landrace-elite recombinants. (A) Flag leaf and peduncle senescence were strongly linked, while they were independent of days to heading. (B) Flag leaf verdancy at the heading had only a minor impact on the progression of senescence. The RILs that exhibited delayed senescence had (C) more grains per spikelet and (D) higher thousand-grain weight, majorly due to (E) wider grains. Note: (B-E) are linear regression plots with the explanatory variable on the x-axis, while the y-axis represents the response variable.  $R^2$  is the phenotypic variance explained, and the corresponding P-values of the regression analysis are displayed.

**Fig. 3.** *bh<sup>1</sup>-A1* induces spike-branching but with a spikelet fertility and grain weight trade-off. (A) A major effect QTL hotspot for spike-branching, grain length and weight was mapped on the short arm of Chr 2A. (B) RILs with the TRI 984 allele showed spike-branching, (C) no difference in grains per 5 spikes, but a reduction in (D) grain length, (E) thousand-grain weight, (F) flag leaf verdancy at heading and (G) spike length. Note: In (B-G), 'n' represents the number of RILs that were compared for each allele class, *viz.*, TRI 984 allele data points are in 'black', while 'cyan' colored data points represent CIRNO allele. 'Unpaired t test' was used to determine the statistical significance, and the resulting P-values (Two-tailed analysis) are displayed for all the comparisons.

**Fig. 4.** *bh<sup>1</sup>-A3*, a new modifier locus for spike-branching. (A) *bh<sup>1</sup>-A3* mediates spike-branching, flag leaf senescence rate, grain filling duration, spikelet fertility and grain yield per spike. The CIRNO allele (B) increases the expressivity of spike-branching (when *bh<sup>1</sup>-A1* is



present), (C) delays flag leaf senescence rate, (D) increases grain filling duration, (E) grains per spikelet, (F) grain yield per five spikes and (G) thousand-grain weight. Note: In (B-G), 'n' represents the number of RILs that were compared for each allele class *viz.*, TRI 984 allele data points are in 'black', while 'cyan' colored data points represent CIRNO allele. 'Unpaired t test' was used to determine the statistical significance, and the resulting P-values (Two-tailed analysis) are displayed for all the comparisons.

**Fig. 5.** *gpc-B1* regulates senescence rate and grain weight. (A) QTLs for overall senescence rate and thousand-grain weight co-localised on Chr 6B. (B) The modern (CIRNO) allele mediated delay in flag leaf senescence, (C) peduncle senescence and (D) days to maturity (spike senescence). The resulting increase in the post-anthesis phase is translated into (E) an increase in grain width, (F) grain length and eventually (G) thousand-grain weight. Note: In (B-G), 'n' represents the number of RILs that were compared for each allele class, *viz.*, TRI 984 allele data points are in 'black', while 'cyan' colored data points represent CIRNO allele. 'Unpaired t test' was used to determine the statistical significance, and the resulting P-values (Two-tailed analysis) are displayed for all the comparisons.

**Fig. 6.** *bh<sup>t</sup>-A1*, *bh<sup>t</sup>-A3*, and *gpc-B1* balance the trade-off between spikelet fertility and grain weight spike-branching recombinants. The RILs with various combinations of alleles were phenotyped at IPK-Gatersleben (2021 & 2022) and the University of Hohenheim (2022). At IPK, the spike-branching RILs that senesce late (*bh<sup>t</sup>-A1+bh<sup>t</sup>-A3+gpc-B1*) have (A) higher grain number per 5 spikes; (B) increased thousand-grain weight at IPK, (C) more grain yield per five spikes and (D) Finally, grain yield per meter row was also higher in the stay-green spike-branching RILs (calculated only at IPK). Likewise, at Hohenheim, (E) we observed more grains per five spikes, (F) but no change in thousand-grain weight; eventually, (G) there was an increase in grain yield per spike. (H) pictorial depiction of the various allelic combinations that are analysed in (A-G). Note: In (A-G), one-way ANOVA followed by Dunnett's test was used to determine the statistical significance. All the comparisons are made with respect to '*bh<sup>t</sup>-A1+BH<sup>t</sup>-A3+GPC-B1*' allelic combination, and the corresponding P-values are displayed in all the graphs (significant ones are in bold). The image (H) is partly created using biorender (<https://biorender.com/>). *bh<sup>t</sup>-A1+BH<sup>t</sup>-A3+GPC-B1*: Recombinants with one locus for spike-branching and two loci for accelerated senescence; *bh<sup>t</sup>-A1+BH<sup>t</sup>-A3+gpc-B1*: Recombinants with one locus each for spike-branching and delayed senescence; *bh<sup>t</sup>-A1+bh<sup>t</sup>-A3+GPC-B1*: Recombinants with two loci for spike-branching, while carrying one locus for delayed

senescence; *bh<sup>t</sup>-A1+bh<sup>t</sup>-A3+gpc-B1*: Recombinants with two loci each for spike-branching and delayed senescence.

**Fig. 7.** Summary of the physiological and genetic basis of interaction among *bh<sup>t</sup>-A1*, *bh<sup>t</sup>-A3*, and *gpc-B1* in the current landrace-elite recombinant population. Note: The image is partly created using biorender (<https://biorender.com/>).

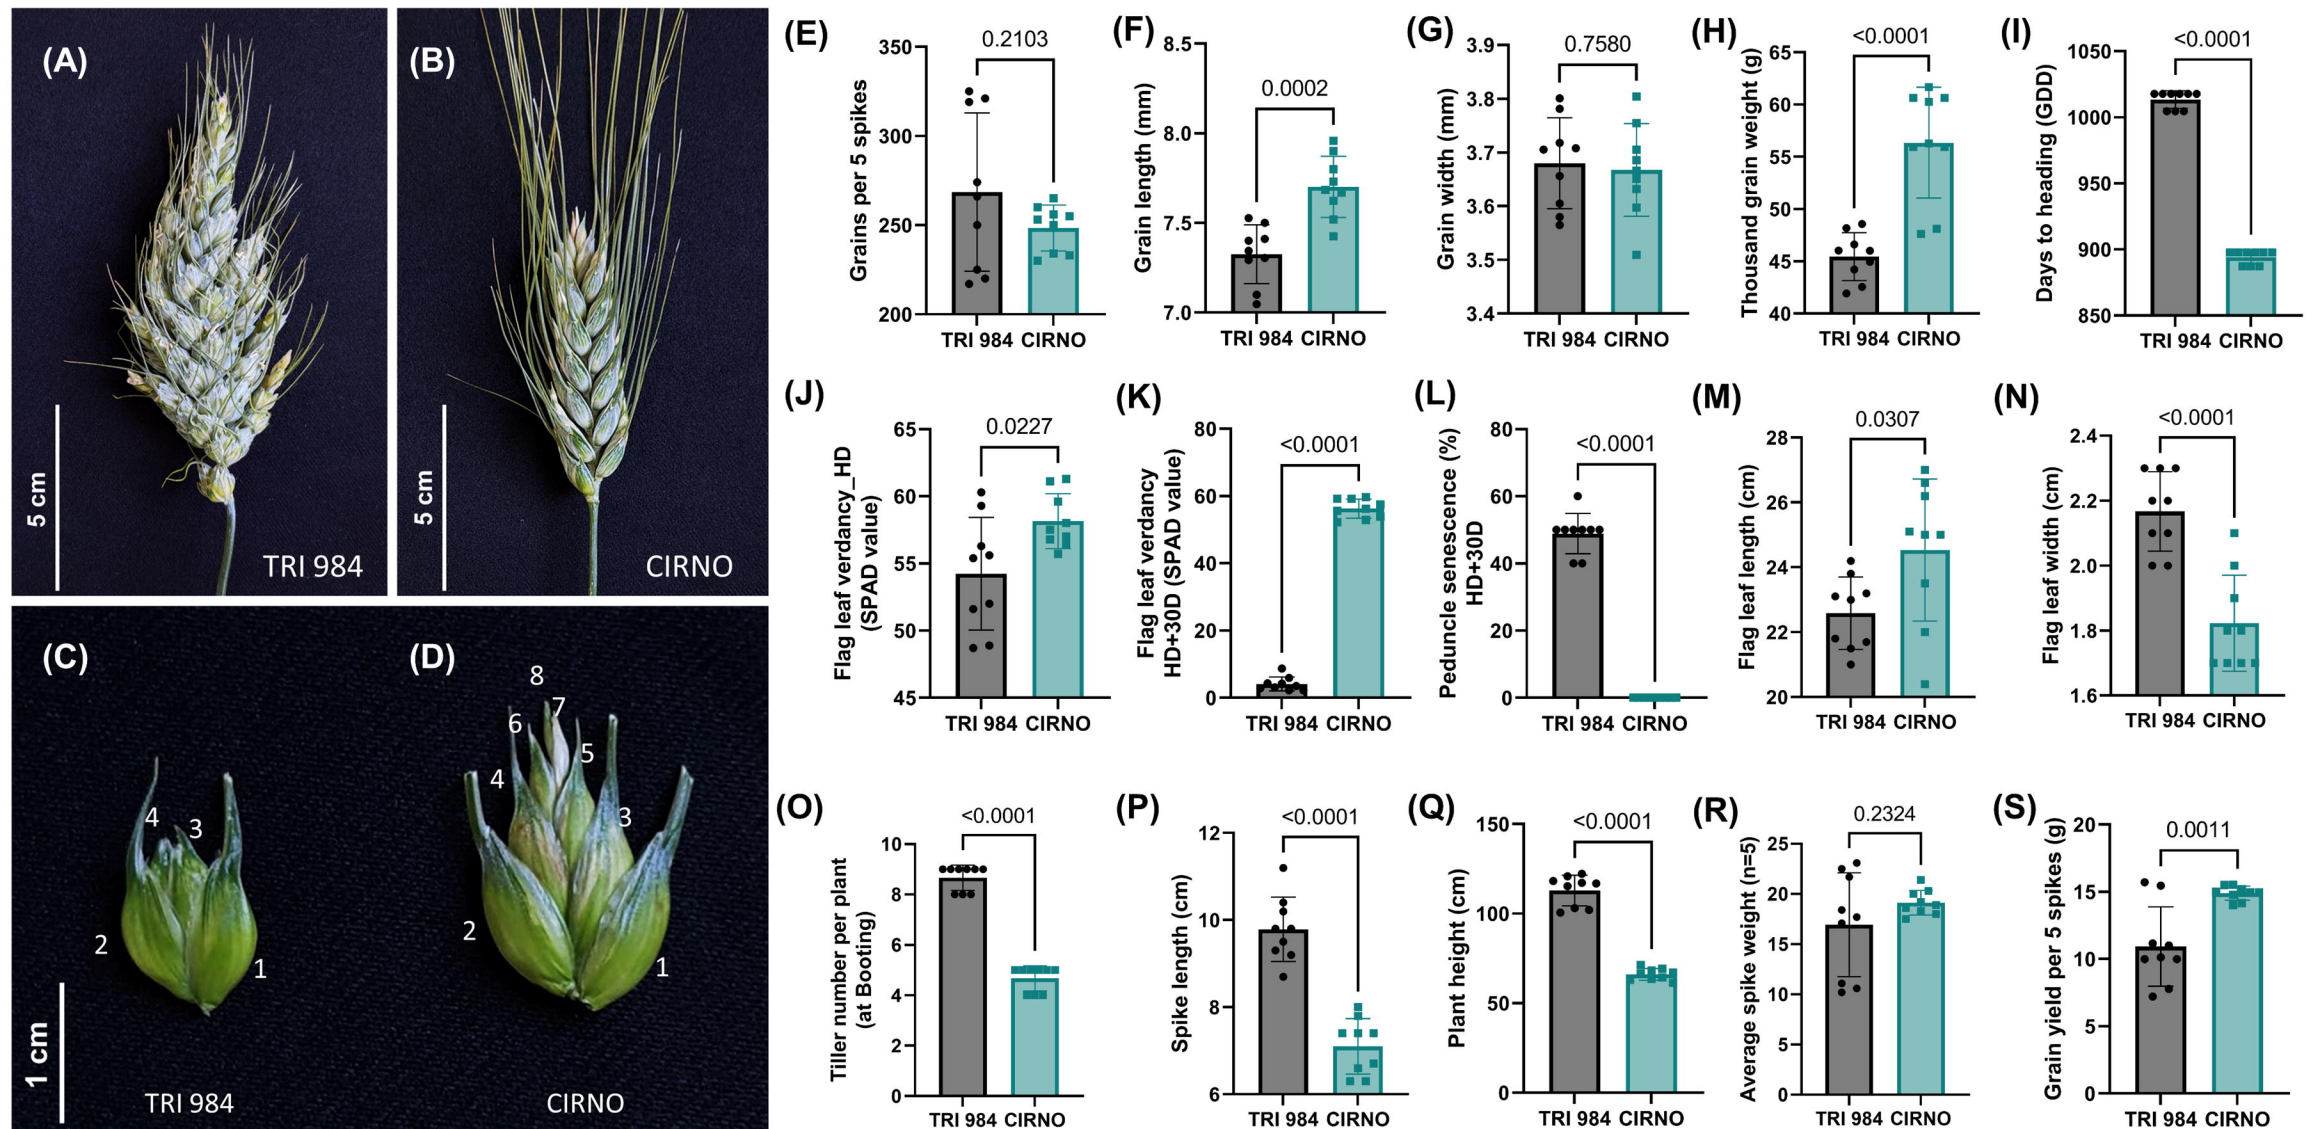

**Fig. 1.** TRI 984 has a poor source-sink balance as opposed to CIRNO. (A) Spike-branching phenotype of TRI 984 and (B) Standard spike of CIRNO. (C) Spikelet from the central part of the TRI 984 main rachis shows reduced florets relative to (D) a spikelet from a similar position in CIRNO. (E) Despite having more spikelets, there is no increase in grain number per 5 spikes in TRI 984. (F-H) However, the grains are smaller in TRI 984, leading to a reduction in thousand-grain weight. (I) TRI 984 exhibited delayed heading, (J) lower flag leaf verdancy at heading, (K, L) accelerated flag leaf and peduncle senescence. TRI 984 had (M, N) shorter but wider flag leaves, (O) more tillers at booting (under greenhouse conditions), (P) longer spikes, (Q) taller plant architecture. (R) There was no difference in spike weight. However, (S) grain yield per five spikes was reduced in TRI 984 compared to CIRNO.

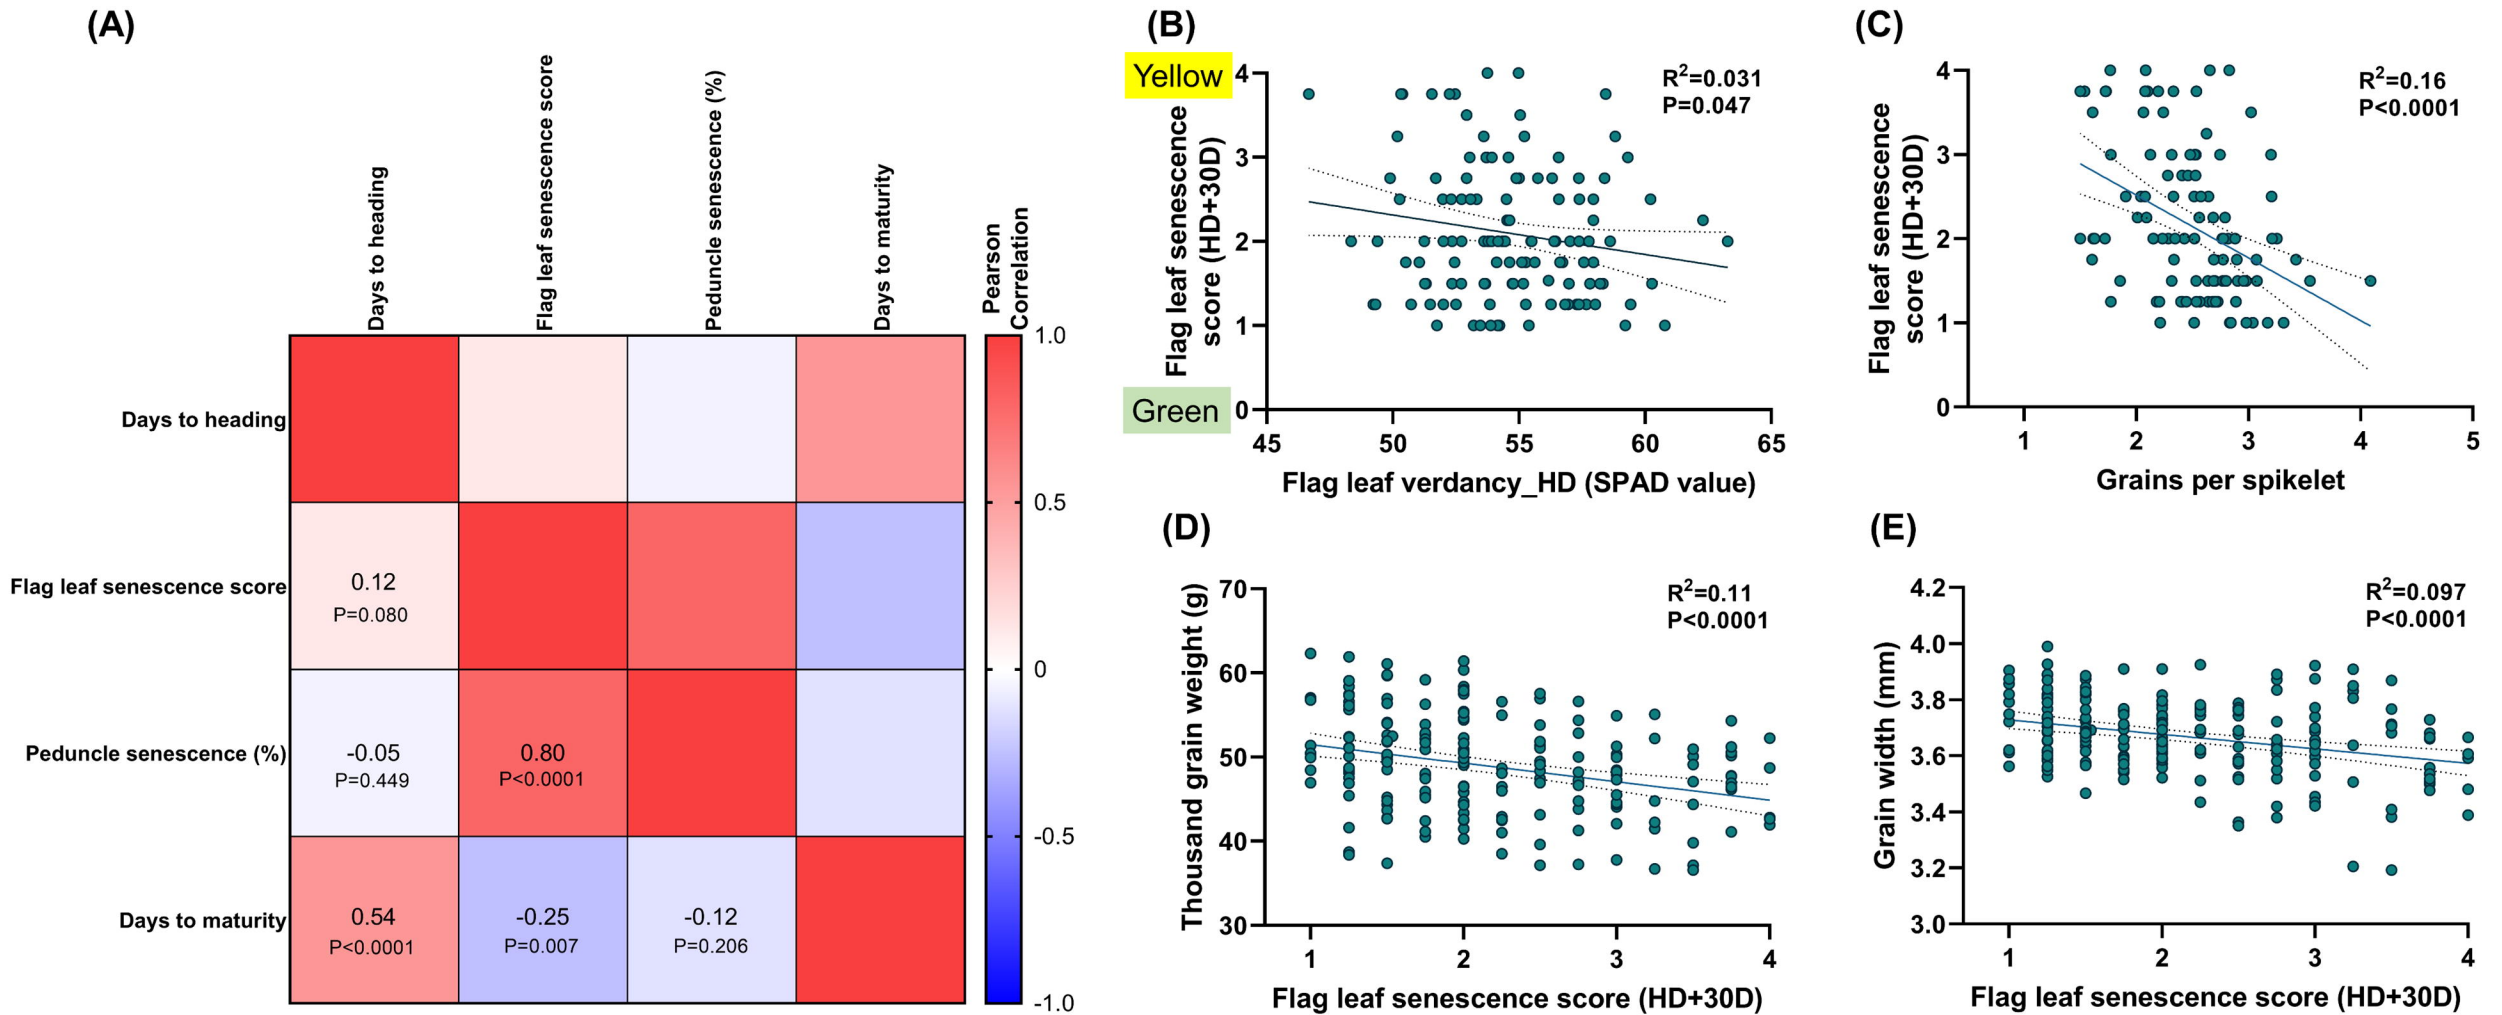

**Fig. 2.** Functional ‘Stay-green’ phenotype was observed in the landrace-elite recombinants. (A) Flag leaf and peduncle senescence were strongly linked, while they were independent of days to heading. (B) Flag leaf verdancy at the heading had only a minor impact on the progression of senescence. The RILs that exhibited delayed senescence had (C) more grains per spikelet and (D) higher thousand-grain weight, majorly due to (E) wider grains. Note: (B-E) are linear regression plots with the explanatory variable on the x-axis, while the y-axis represents the response variable.  $R^2$  is the phenotypic variance explained, and the corresponding P-values of the regression analysis are displayed.

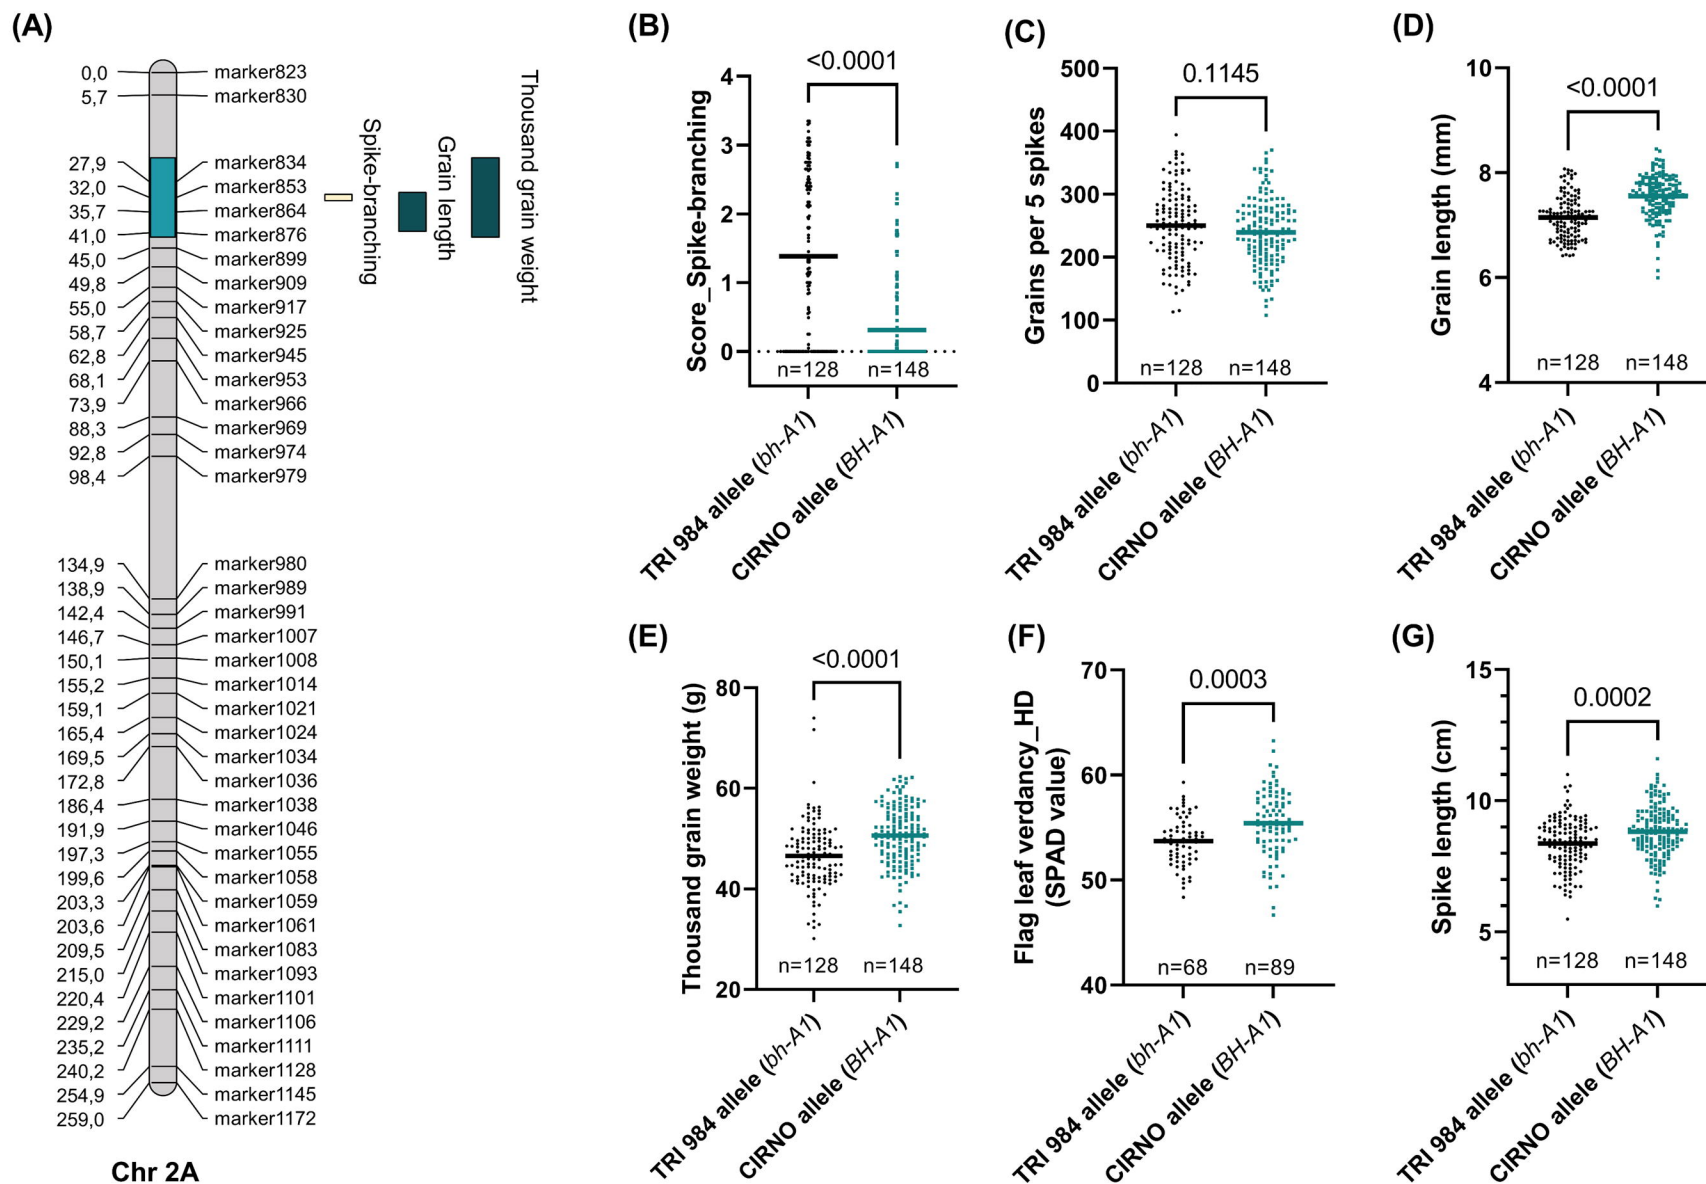

**Fig. 3.** *bh<sup>t</sup>-A1* induces spike-branching but with a spikelet fertility and grain weight trade-off. (A) A major effect QTL hotspot for spike-branching, grain length and weight was mapped on the short arm of Chr 2A. (B) RILs with the TRI 984 allele showed spike-branching, (C) no difference in grains per 5 spikes, but a reduction in (D) grain length, (E) thousand-grain weight, (F) flag leaf verdancy at heading and (G) spike length. Note: In (B-G), 'n' represents the number of RILs that were compared for each allele class, viz., TRI 984 allele data points are in 'black', while 'cyan' colored data points represent CIRNO allele. 'Unpaired t test' was used to determine the statistical significance, and the resulting P-values (Two-tailed analysis) are displayed for all the comparisons.

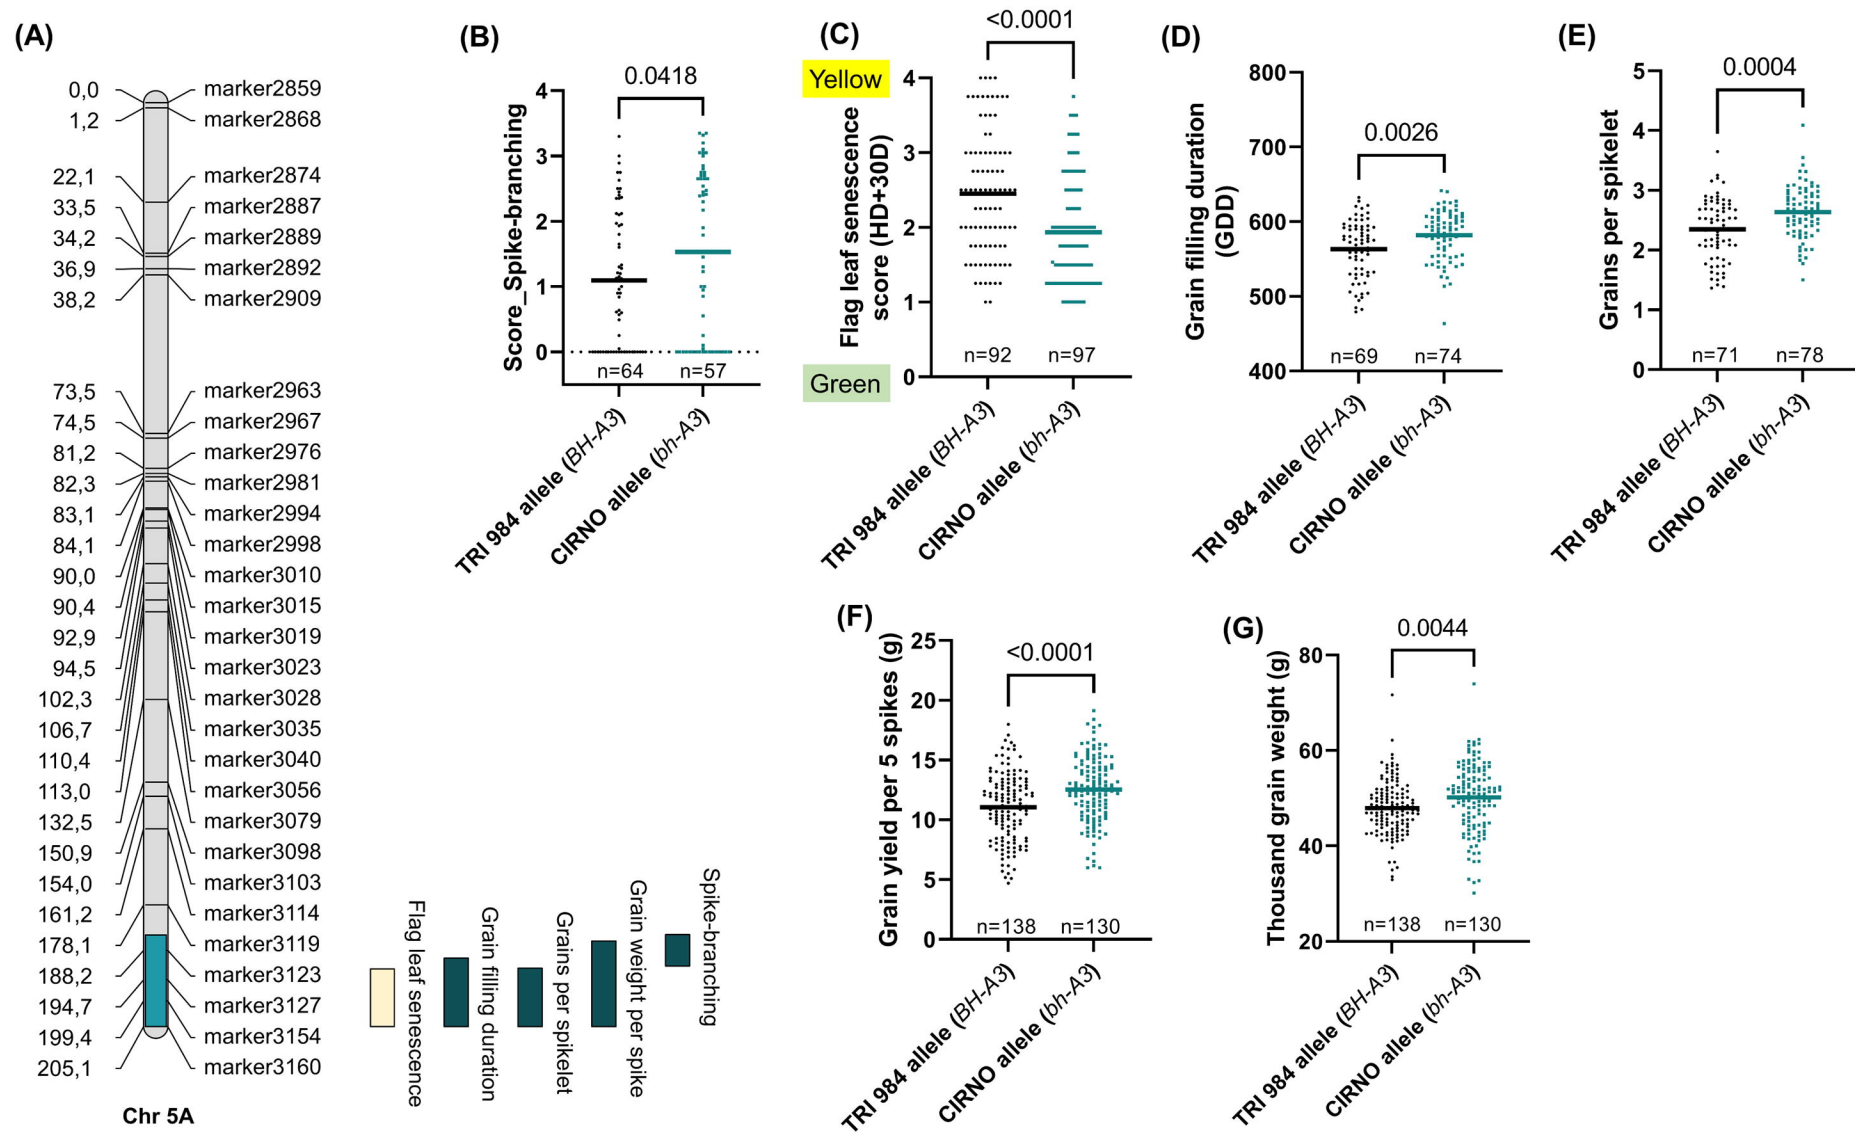

**Fig. 4.** *bh<sup>t</sup>-A3*, a new modifier locus for spike-branching. (A) *bh<sup>t</sup>-A3* mediates spike-branching, flag leaf senescence rate, grain filling duration, spikelet fertility and grain yield per spike. The CIRNO allele (B) increases the expressivity of spike-branching (when *bh<sup>t</sup>-A1* is present), (C) delays flag leaf senescence rate, (D) increases grain filling duration, (E) grains per spikelet, (F) grain yield per five spikes and (G) thousand-grain weight. Note: In (B-G), 'n' represents the number of RILs that were compared for each allele class viz., TRI 984 allele data points are in 'black', while 'cyan' colored data points represent CIRNO allele. 'Unpaired t test' was used to determine the statistical significance, and the resulting P-values (Two-tailed analysis) are displayed for all the comparisons.

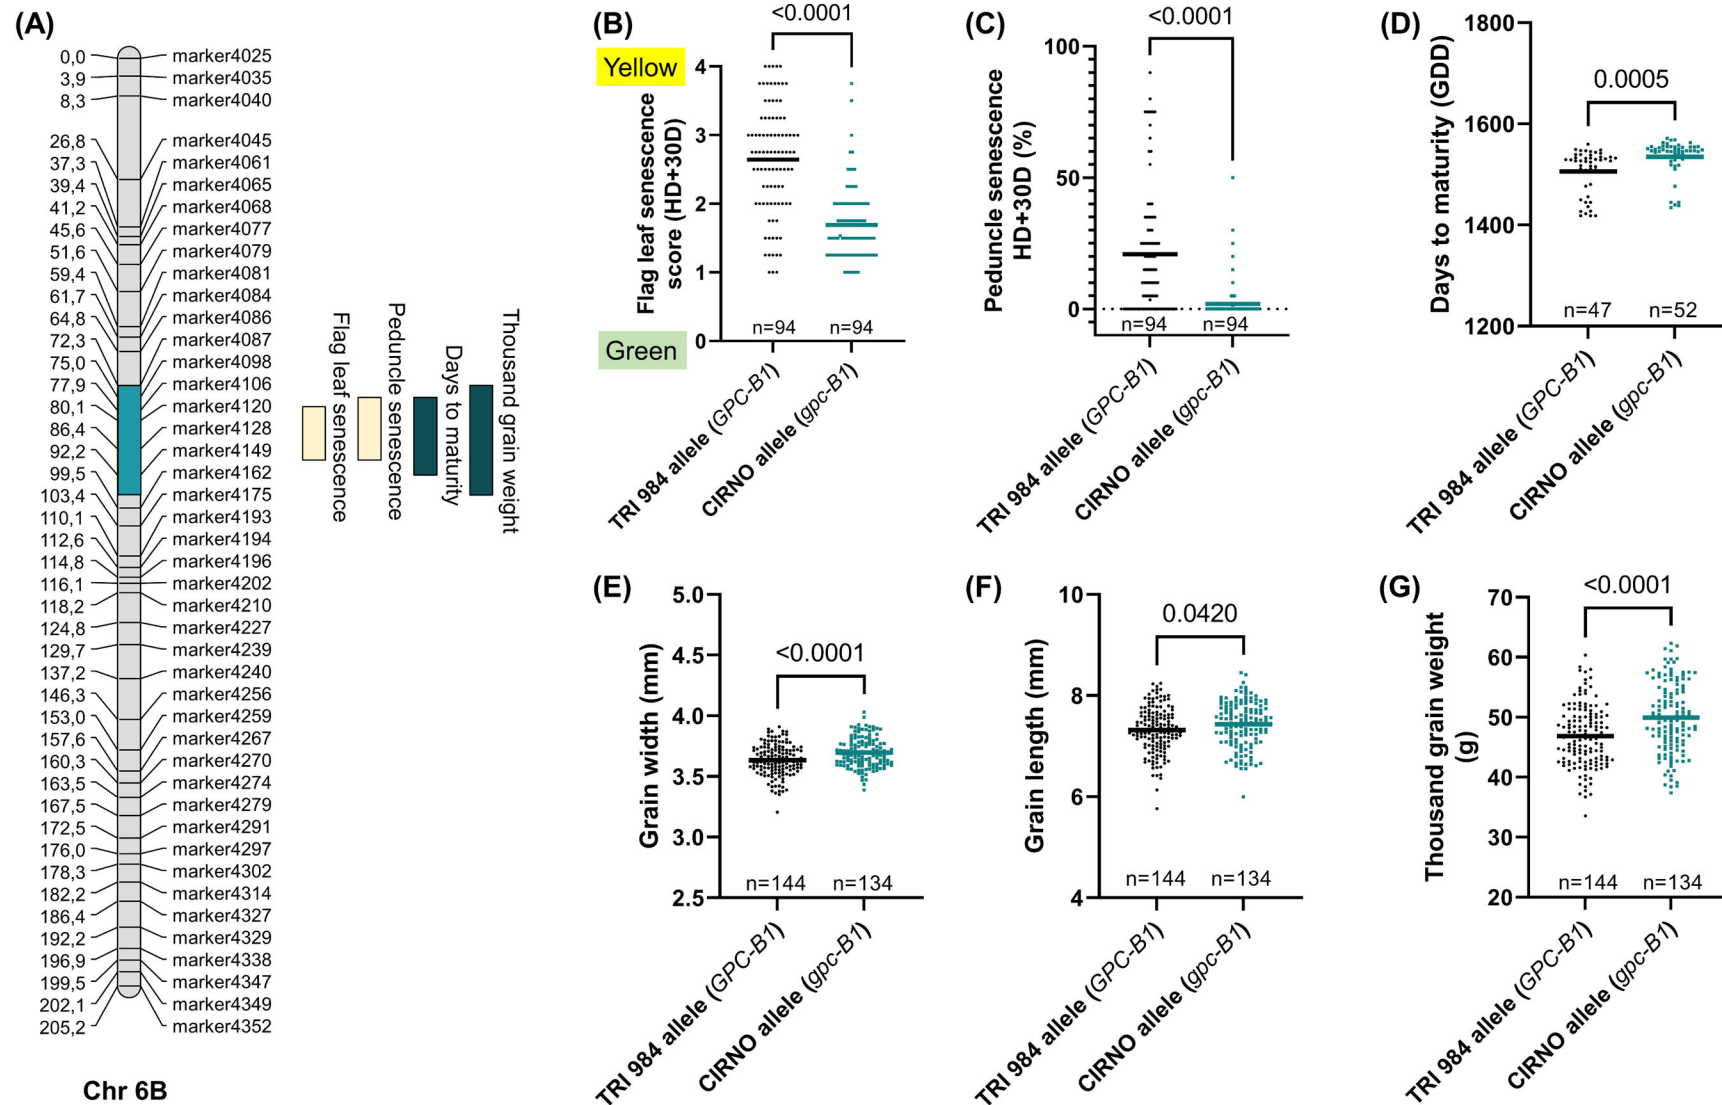

**Fig. 5.** *gpc-B1* regulates senescence rate and grain weight. (A) QTLs for overall senescence rate and thousand-grain weight co-localised on Chr 6B. (B) The modern (CIRNO) allele mediated delay in flag leaf senescence, (C) peduncle senescence and (D) days to maturity (spike senescence). The resulting increase in the post-anthesis phase is translated into (E) an increase in grain width, (F) grain length and eventually (G) thousand-grain weight. Note: In (B-G), 'n' represents the number of RILs that were compared for each allele class, viz., TRI 984 allele data points are in 'black', while 'cyan' colored data points represent CIRNO allele. 'Unpaired t test' was used to determine the statistical significance, and the resulting P-values (Two-tailed analysis) are displayed for all the comparisons.

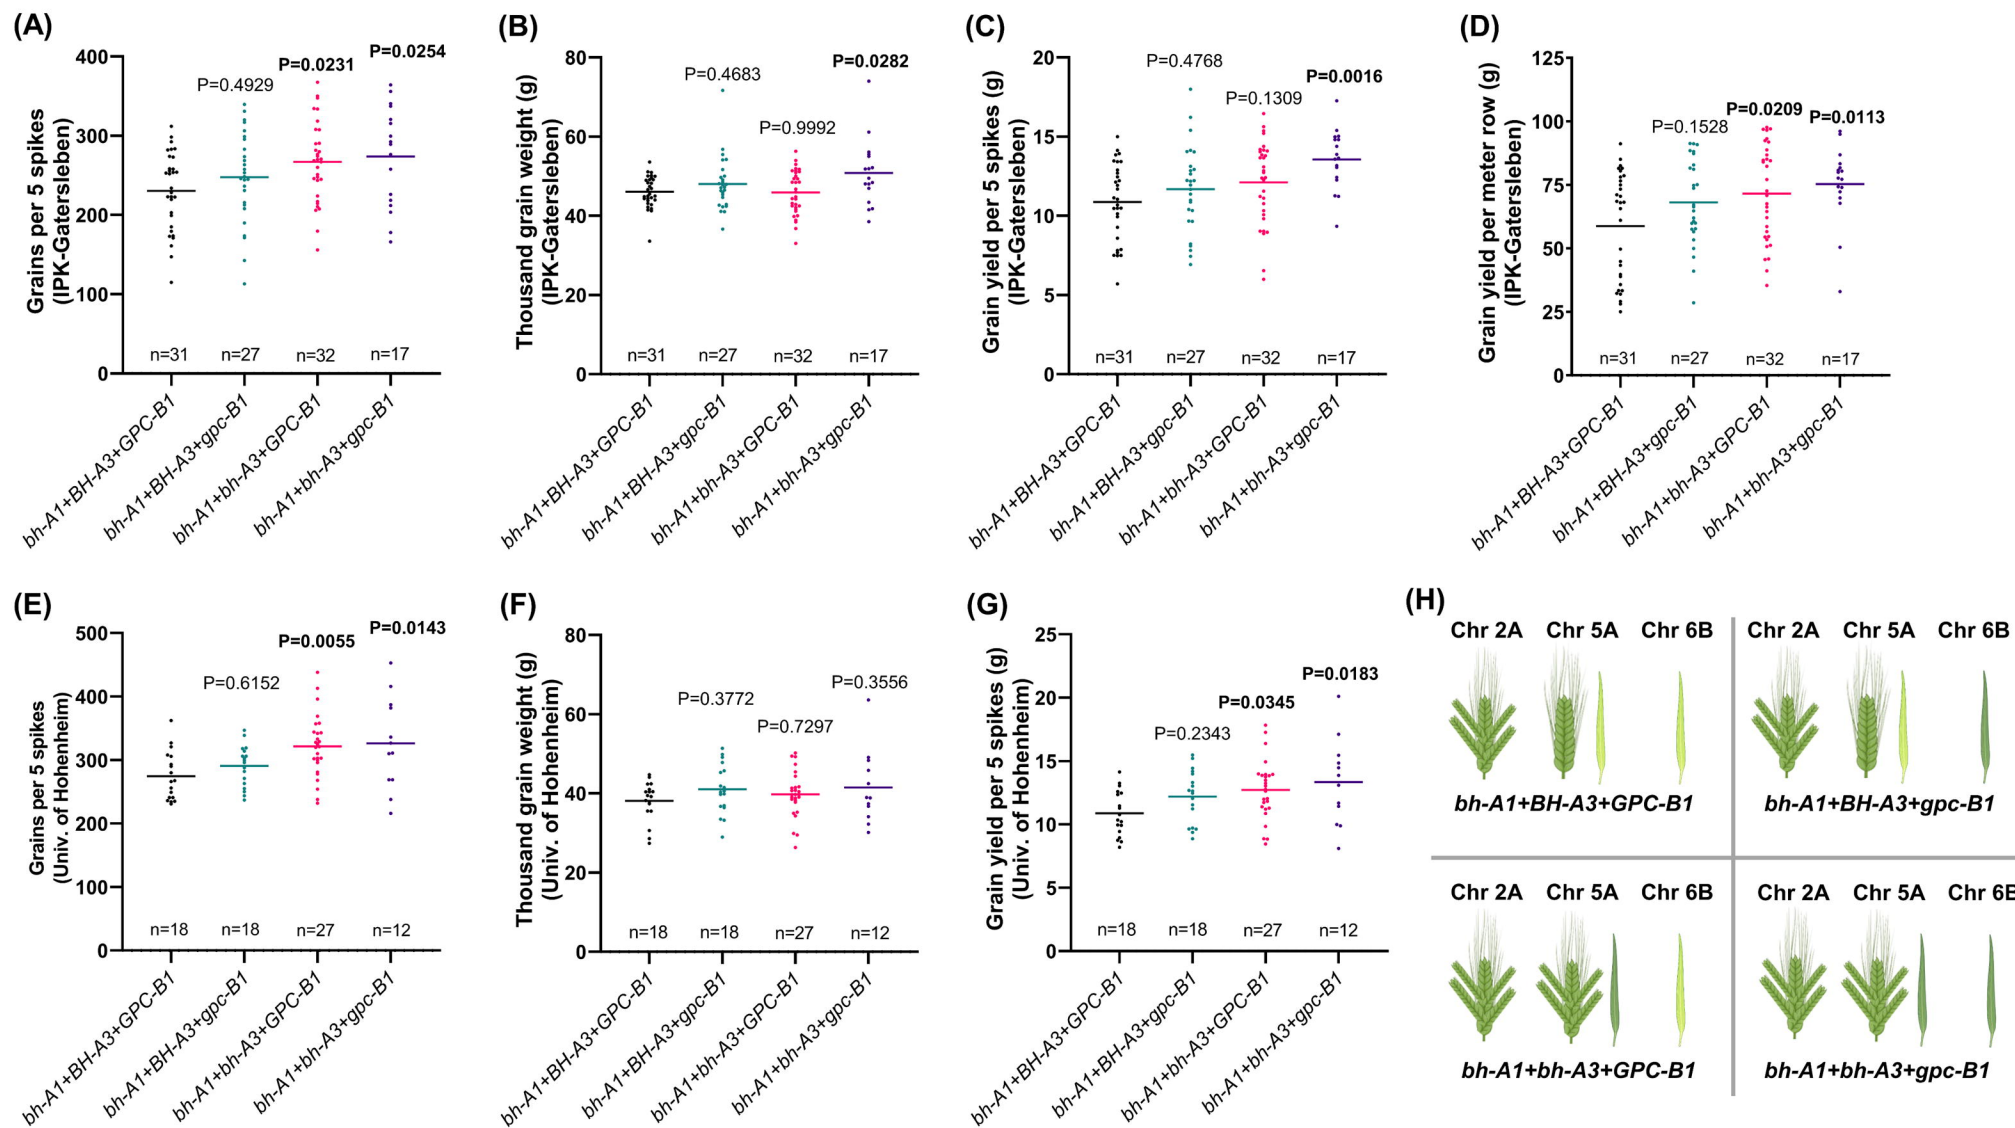

**Fig. 6.** *bh<sup>t</sup>-A1*, *bh<sup>t</sup>-A3*, and *gpc-B1* balance the trade-off between spikelet fertility and grain weight spike-branching recombinants. The RILs with various combinations of alleles were phenotyped at IPK-Gatersleben (2021 & 2022) and the University of Hohenheim (2022). At IPK, the spike-branching RILs that senesce late (*bh<sup>t</sup>-A1+bh<sup>t</sup>-A3+gpc-B1*) have (A) higher grain number per 5 spikes; (B) increased thousand-grain weight at IPK, (C) more grain yield per five spikes and (D) Finally, grain yield per meter row was also higher in the stay-green spike-branching RILs (calculated only at IPK). Likewise, at Hohenheim, (E) we observed more grains per five spikes, (F) but no change in thousand-grain weight; eventually, (G) there was an increase in grain yield per spike. (H) pictorial depiction of the various allelic combinations that are analysed in (A-G). Note: In (A-G), one-way ANOVA followed by Dunnett's test was used to determine the statistical significance. All the comparisons are made with respect to '*bh<sup>t</sup>-A1+BH<sup>t</sup>-A3+GPC-B1*' allelic combination, and the corresponding P-values are displayed in all the graphs (significant ones are in bold). The image (H) is partly created using biorender (<https://biorender.com/>).



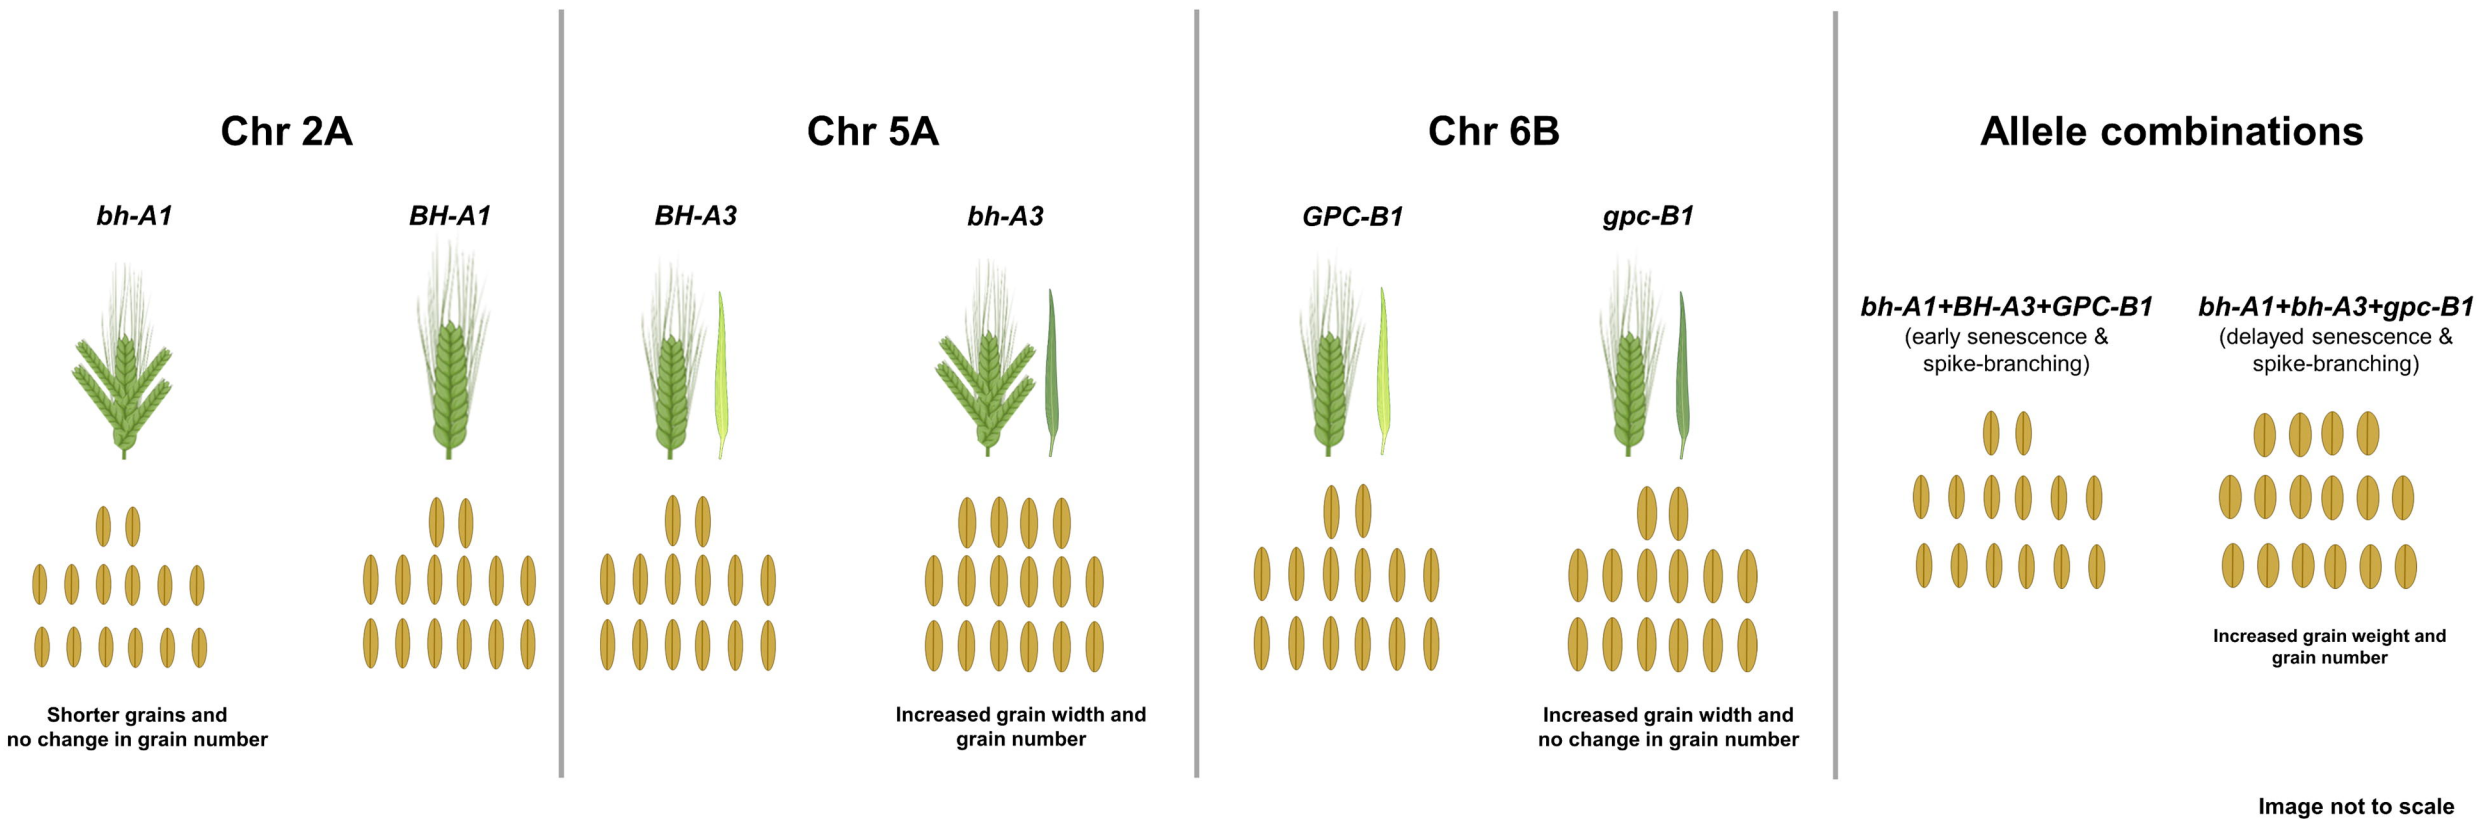

**Fig. 7.** Summary of the physiological and genetic basis of interaction among *bh<sup>t</sup>-A1*, *bh<sup>t</sup>-A3*, and *gpc-B1* in the current landrace-elite recombinant population. Note: The image is partly created using biorender (<https://biorender.com/>).
